# Supplementary material
Source: MDPI journal article supplement (https://www.mdpi.com/2079-3197/12/5/94)
Supplement: s1 [file s1]

To bind or not to bind? A comprehensive characterization of TIR1 and auxins using consensus *in silico* approaches.

*Fernando D. Prieto-Martínez<sup>\*1</sup>, Jennifer Mendoza-Cañas<sup>2</sup> and Karina Martínez-Mayorga<sup>1,3</sup>*

*1 Instituto de Química, Unidad Mérida, Universidad Nacional Autónoma de México, Carretera Mérida-Tetiz, Km. 4.5, Ucú, Yucatán, México; ferdpm4@hotmail.com*

*2 Facultad de Química, Universidad Nacional Autónoma de México, Avenida Universidad 3000, Mexico City 04510, Mexico; kmtzm@unam.mx*

*3 Instituto de Investigaciones en Matemáticas Aplicadas y en Sistemas, Unidad Mérida, Universidad Nacional Autónoma de México, Sierra Papacal, Mérida, Yucatán, México; kmtzm@unam.mx*

*\*Correspondence: ferdpm4@hotmail.com; (F.D.P.M)*

### ***Table of contents***

**Table S1.** Parameters used for OpenGrowth in the present study.

**Table S2.** Molecular descriptors selected by the Boruta algorithm.

**Table S3.** Loading values from principal component analyses for the Boruta defined space and RO5 space.

**Table S4.** Hyperparameter values determined by grid search for the trained classifiers only with physicochemical descriptors.

**Table S5.** Hyperparameter values determined by grid search for the trained classifiers with physicochemical and structural descriptors.

**Figure S1.** Chemical space of the generated compounds; using descriptors from the Rule of Five. Projection comes from principal component analysis (left) and t-SNE (right).

**Figure S2.** Performance assessment of logistic regression classifier trained with physicochemical descriptors.

**Figure S3.** Performance assessment of logistic regression classifier trained with physicochemical and structural descriptors.

**Figure S4.** Performance assessment of supporting vectors classifier trained with physicochemical descriptors.

**Figure S5.** Performance assessment of supporting vectors classifier trained with physicochemical and structural descriptors.

**Figure S6.** Performance assessment of random forest classifier trained with physicochemical descriptors.

**Figure S7.** Performance assessment of random forest classifier trained with physicochemical and structural descriptors.

**Figure S8.** Performance assessment of extreme gradient boost classifier trained with physicochemical descriptors.

**Figure S9.** Performance assessment of extreme gradient boost classifier trained with physicochemical and structural descriptors.

**Figure S10.** Comparison of IAA root mean square fluctuations (RMSF) from different solvation conditions.

**Figure S11.** Comparison of NAA root mean square fluctuations (RMSF) from different solvation conditions.

**Figure S12.** Comparison of 2,4-D root mean square fluctuations (RMSF) from different solvation conditions.

**Figure S13.** Comparison of TRP root mean square fluctuations (RMSF) from different solvation conditions.

**Figure S14.** Consensus analysis of MD simulation of indol acetic acid (IAA).

**Figure S15.** Consensus analysis of MD simulation of tryptophan (TRP).

**Figure S16.** Consensus analysis of MD simulation of  $\alpha$ -naphthyl acetic acid (NAA).

**Figure S17.** Consensus analysis of MD simulation of  $\beta$ -naphthyl acetic acid (2-NAA).

**Figure S18.** Consensus analysis of MD simulation of fluroxypy (FXY).

**Figure S19.** Consensus analysis of MD simulation of rinskor (RSK).

**Figure S20.** Free energy surfaces computed from well-tempered metadynamics for the NAA/TIR1 complexes.

**Figure S21.** Representative NAA conformations found at basins from metadynamics runs.

**Figure S22.** Free energy surfaces computed from well-tempered metadynamics for the 2-NAA/TIR1 complexes.

**Figure S23.** Representative 2-NAA conformations found at basins from metadynamics runs.

**Figure S24.** Free energy surfaces computed from well-tempered metadynamics for the FXY/TIR1 complexes.

**Figure S25.** Representative FXY conformations found at basins from metadynamics runs.

**Figure S26.** Free energy surfaces computed from well-tempered metadynamics for the IAA/TIR1 complexes.

**Figure S27.** Representative IAA conformations found at basins from metadynamics runs.

**Figure S28.** Free energy surfaces computed from well-tempered metadynamics for the RSK/TIR1 complexes.

**Figure S29.** Representative RSK conformations found at basins from metadynamics runs.

**Figure S30.** Free energy surfaces computed from well-tempered metadynamics for the TRP/TIR1 complexes.

**Figure S31.** Representative TRP conformations found at basins from metadynamics runs.

**Table S1.** Parameters used for OpenGrowth in the present study.

| Parameter              | Value      |
|------------------------|------------|
| SCORING_FUNCTION       | SMOG2016   |
| BINDING_SITE_X         | 7.535      |
| BINDING_SITE_Y         | -111.72    |
| BINDING_SITE_Z         | -25.923    |
| BINDINGBOX_SIZE        | 0.50       |
| MODE                   | DENOVO     |
| GROWTH_MODE            | FOG        |
| VDW_SCALE_INTER        | 0.70       |
| VDW_SCALE_INTRA        | 0.70       |
| ROTATION_PRECISION     | 24         |
| OPTIMIZATION_MODE      | 22         |
| OPTIMIZATION_NUMBER    | 20         |
| OPTIMIZATION_ITERATION | 10         |
| S                      |            |
| MAX_FRAGMENTS          | 20         |
| MAX_ATOMS              | 60         |
| MAX_MW                 | 550        |
| MAX_ITERATIONS         | 10         |
| AVERAGE_TYPE           | ARITHMETIC |

**Table S2.** Molecular descriptors selected by the Boruta algorithm.

| Descriptor | Description                                                                     |
|------------|---------------------------------------------------------------------------------|
| nAromBond  | aromatic bonds count                                                            |
| ATS8se     | Moreau-Broto autocorrelation of lag 8                                           |
| AATS1d     | averaged Moreau-Broto autocorrelation of lag 1 weighted by sigma electrons      |
| ATSC7i     | centered Moreau-Broto autocorrelation of lag 7 weighted by ionization potential |
| SdssC      | Sum of electrotopological state indexes (dssC)                                  |
| SdO        | Sum of dO                                                                       |
| ATS6d      | Moreau-Broto autocorrelation of lag 6 weighted by sigma electrons               |

**Table S3.** Loading values from principal component analyses for the Boruta defined space and RO5 space.

| PC# | Boruta space | RO5 space |
|-----|--------------|-----------|
| 1   | 26.67        | 46.65     |
| 2   | 16.57        | 25.44     |
| 3   | 14.72        | 14.82     |
| 4   | 14.24        | 8.32      |
| 5   | 13.5         | 3.17      |
| 6   | 8.90         | 1.6       |
| 7   | 5.4          | ---       |

**Table S4.** Hyperparameter values determined by grid search for the trained classifiers only with physicochemical descriptors.

| Classifier                | Hyperparameters                                                            | Values                     |
|---------------------------|----------------------------------------------------------------------------|----------------------------|
| Logistic Regression       | penalty, solver, C, class_weight                                           | l2, lbfgs, 10000, balanced |
| Support vector classifier | kernel, C, gamma                                                           | rbf, 1, 0.1                |
| Random Forest classifier  | criterion, max_features, min_samples_leaf, min_samples_split, n_estimators | gini, auto, 4, 2, 1000     |
| XGboost classifier        | n_estimators, booster                                                      | 50, gblinear               |

**Table S5.** Hyperparameter values determined by grid search for the trained classifiers with physicochemical and structural descriptors.

| Classifier                | Hyperparameters                                                            | Values                         |
|---------------------------|----------------------------------------------------------------------------|--------------------------------|
| Logistic Regression       | penalty, solver, C, class_weight                                           | l2, newton-cg, 10000, balanced |
| Support vector classifier | kernel, C                                                                  | linear, 1                      |
| Random Forest classifier  | criterion, max_features, min_samples_leaf, min_samples_split, n_estimators | entropy, sqrt, 1, 10, 800      |
| XGboost classifier        | n_estimators, booster                                                      | 200, dart                      |

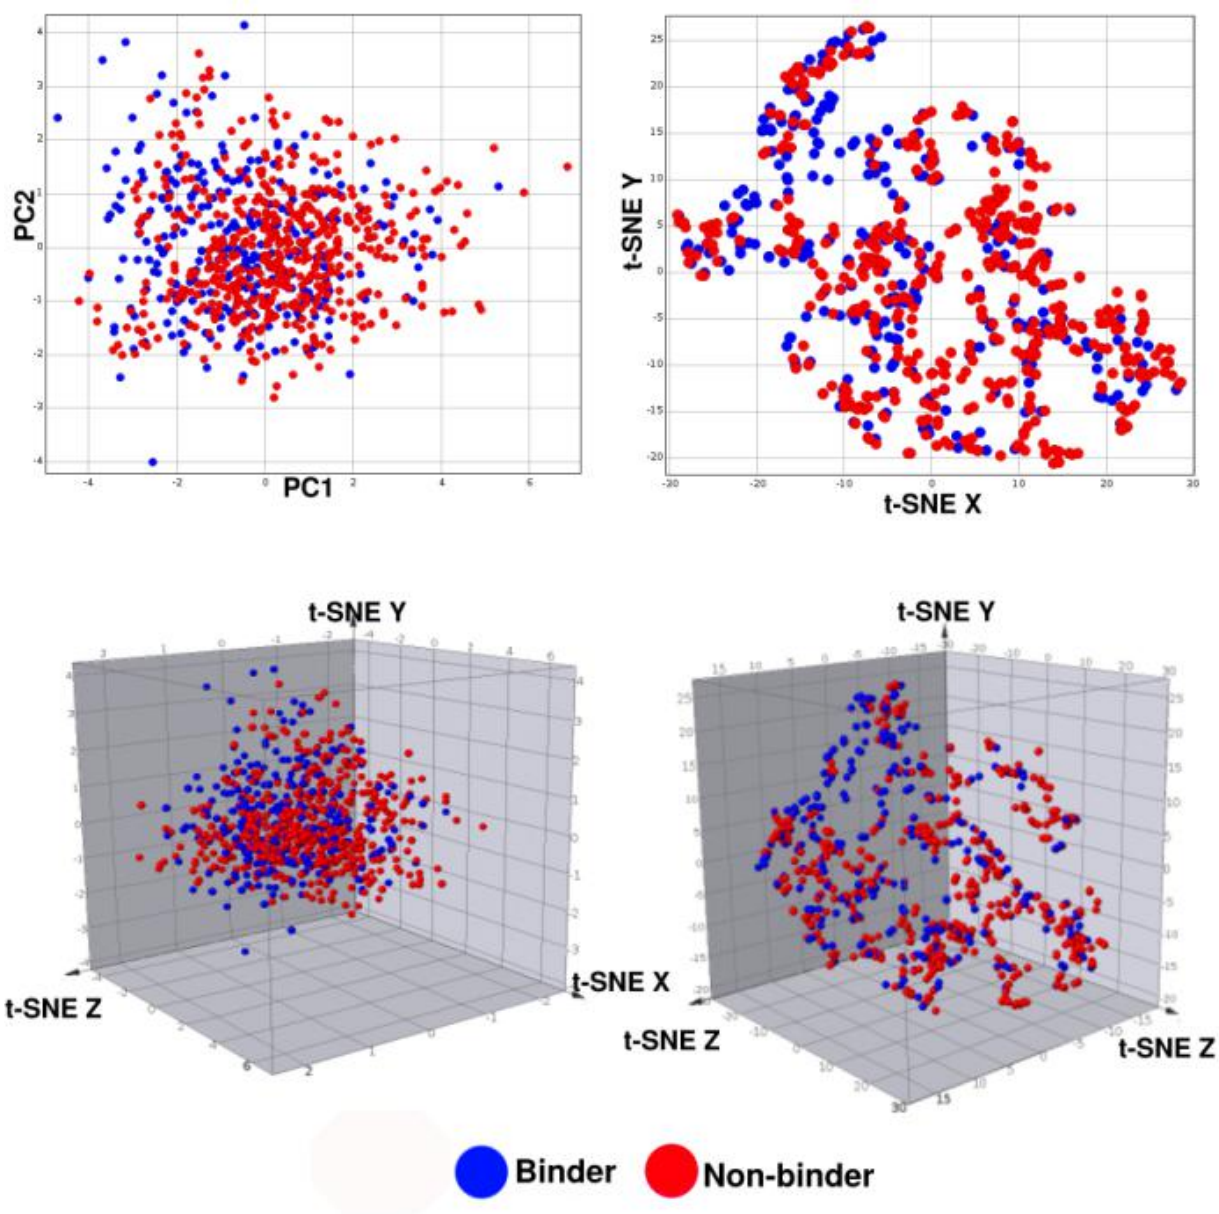

**Figure S1.** Chemical space of the generated compounds; using descriptors from the Rule of Five. Projection comes from principal component analysis (left) and t-SNE (right).

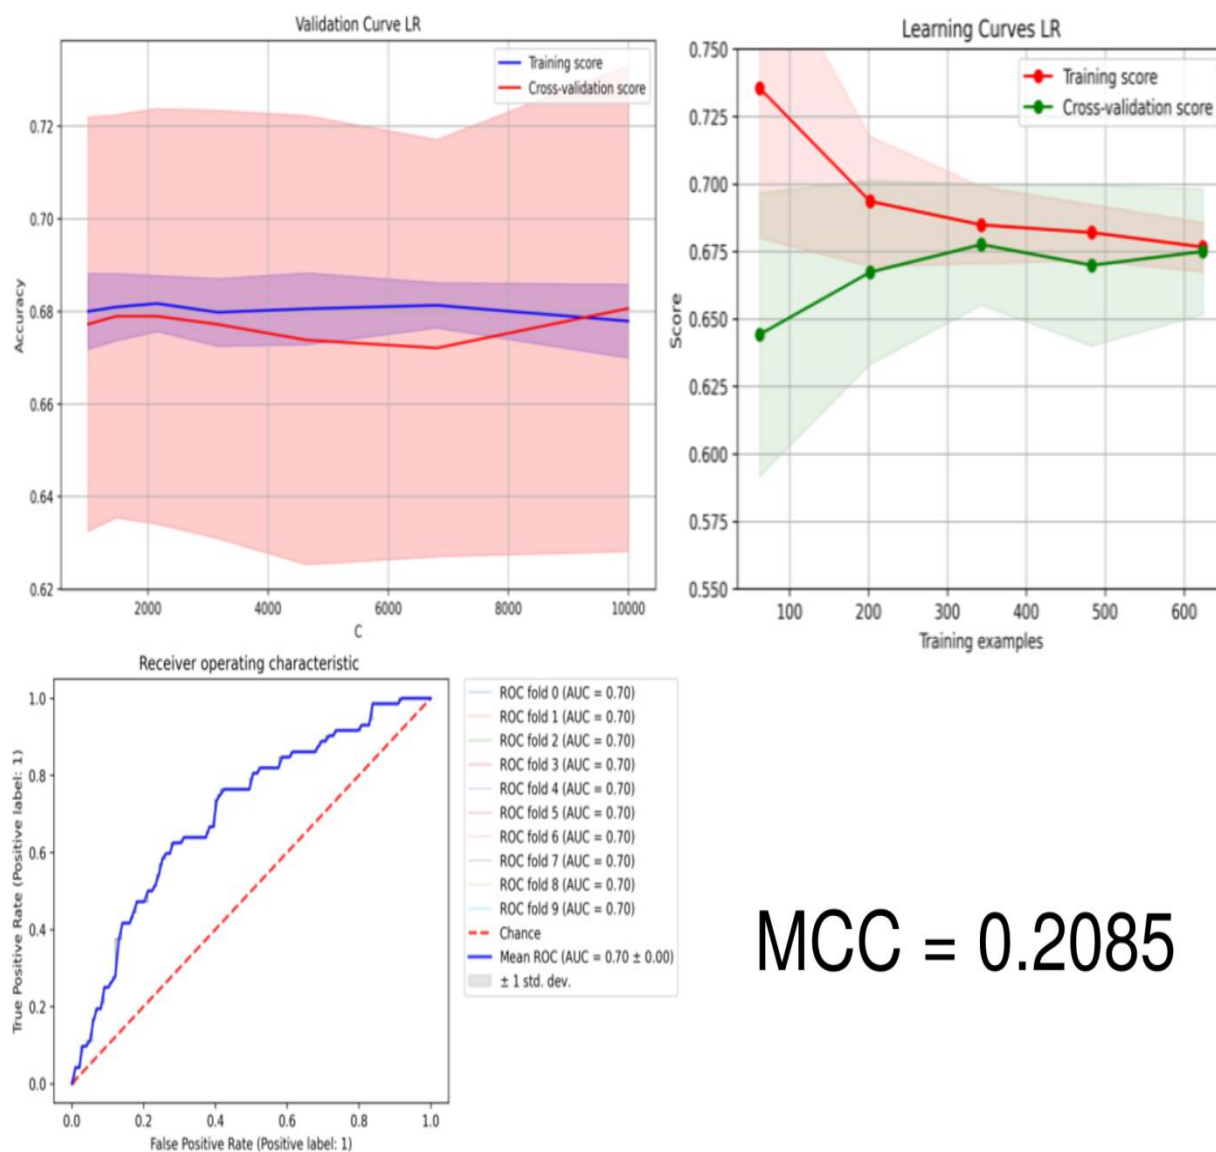

MCC = 0.2085

**Figure S2.** Performance assessment of logistic regression classifier trained with physicochemical descriptors. In order of appearance figure shows model's validation curve, learning curve, k-fold cross validation ROC curve and Matthews correlation coefficient.

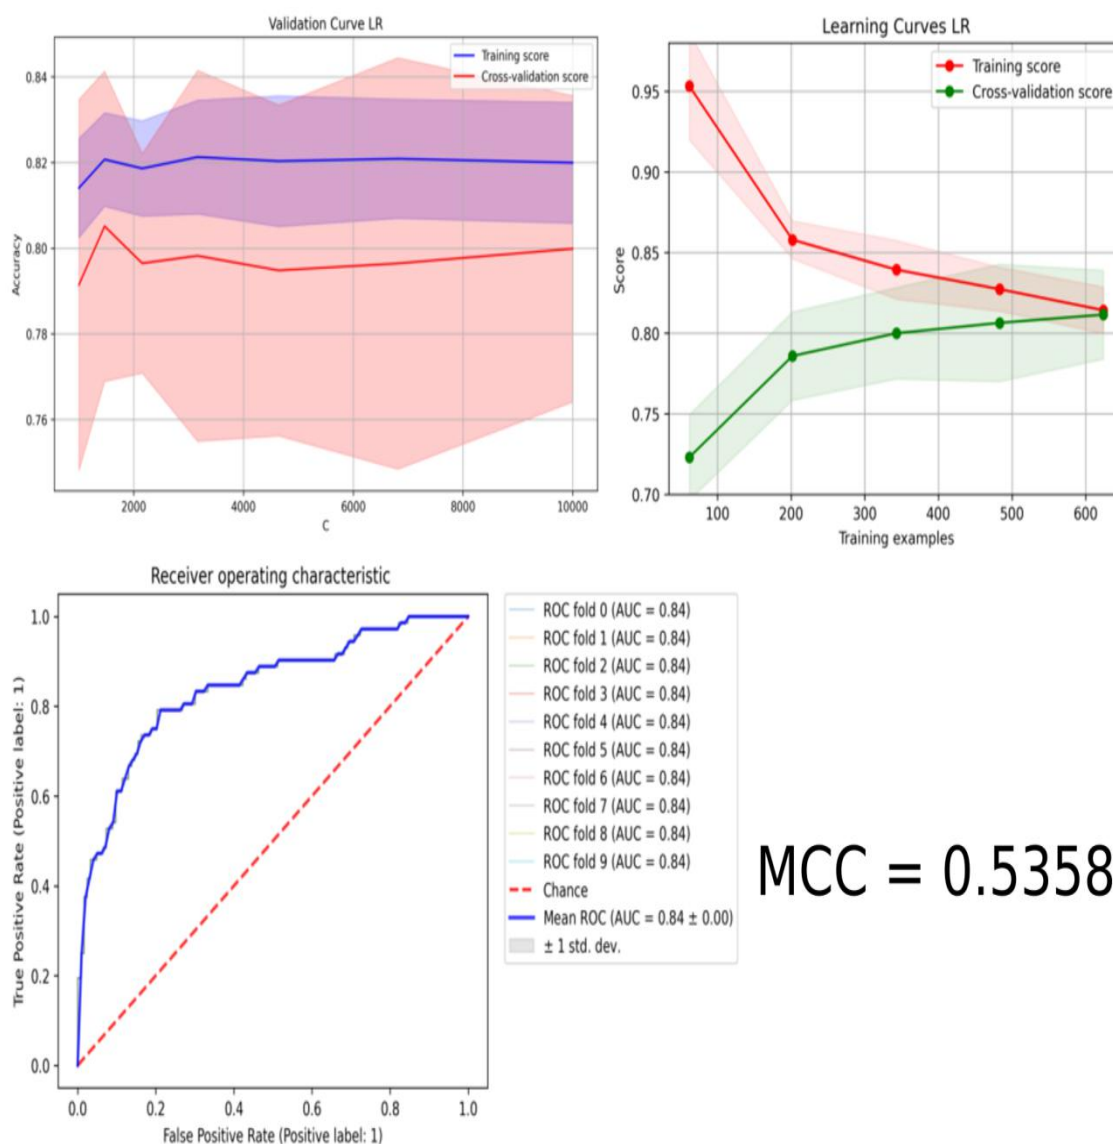

**Figure S3.** Performance assessment of logistic regression classifier trained with physicochemical and structural descriptors. In order of appearance figure shows model's validation curve, learning curve, k-fold cross validation ROC curve and Matthews correlation coefficient.

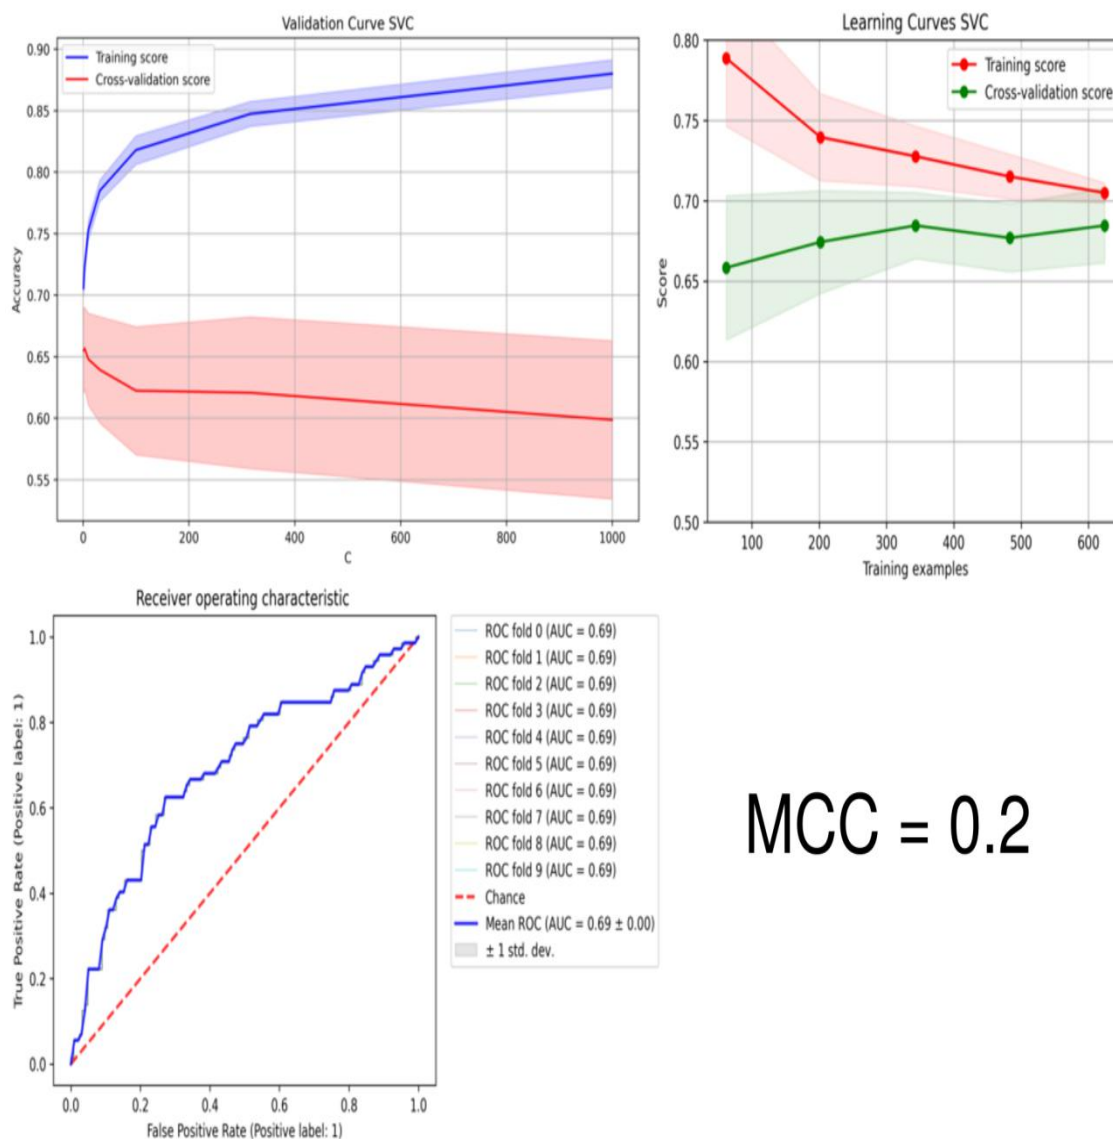

MCC = 0.2

**Figure S4.** Performance assessment of supporting vectors classifier trained with physicochemical descriptors. In order of appereance figure shows model's validation curve, learning curve, k-fold cross validation ROC curve and Matthews correlation coefficient.



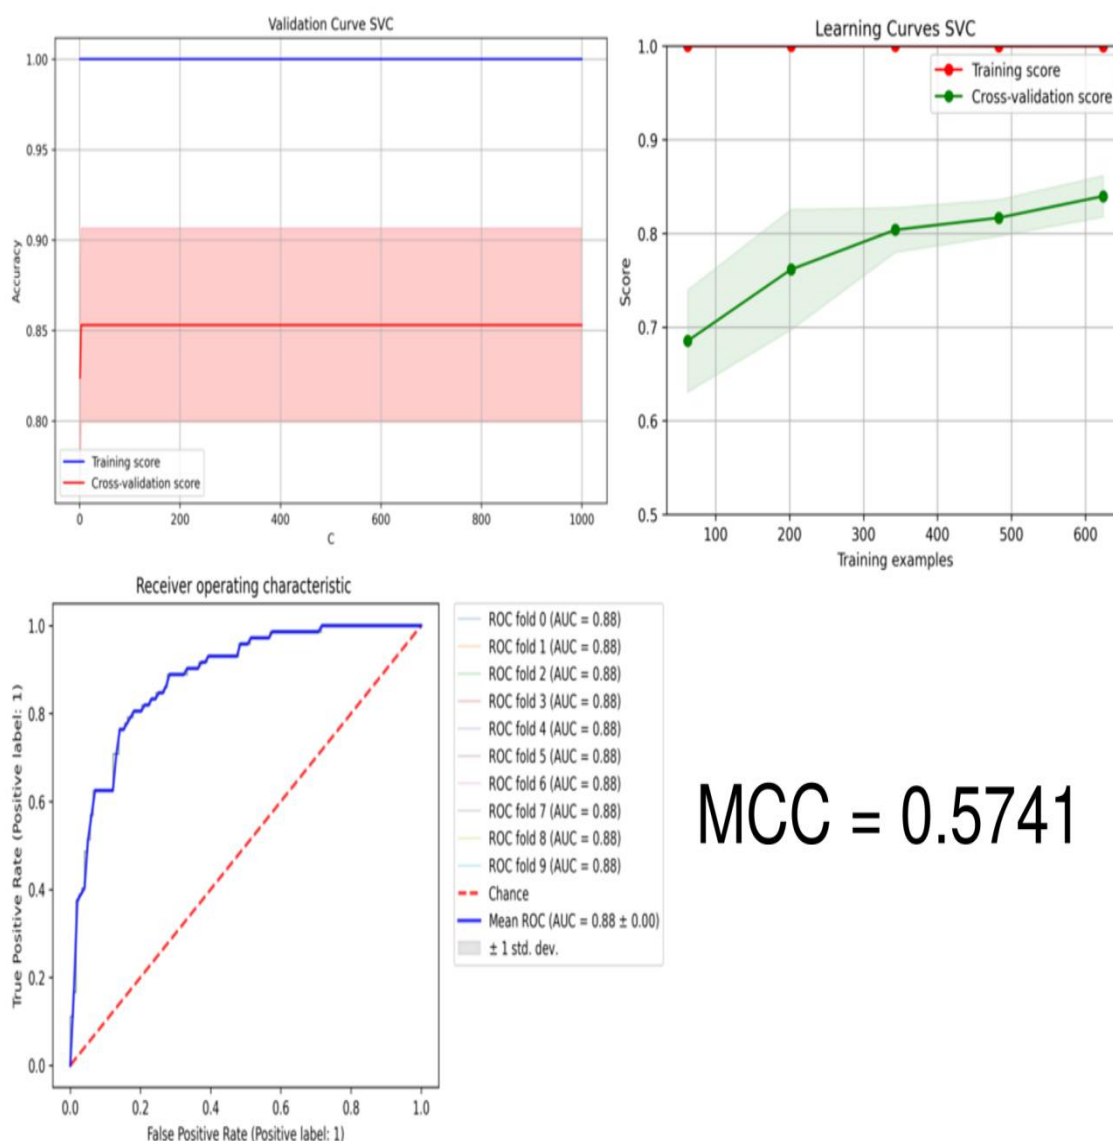

**Figure S5.** Performance assessment of supporting vectors classifier trained with physicochemical descriptors. In order of appereance figure shows model's validation curve, learning curve, k-fold cross validation ROC curve and Matthews correlation coefficient.

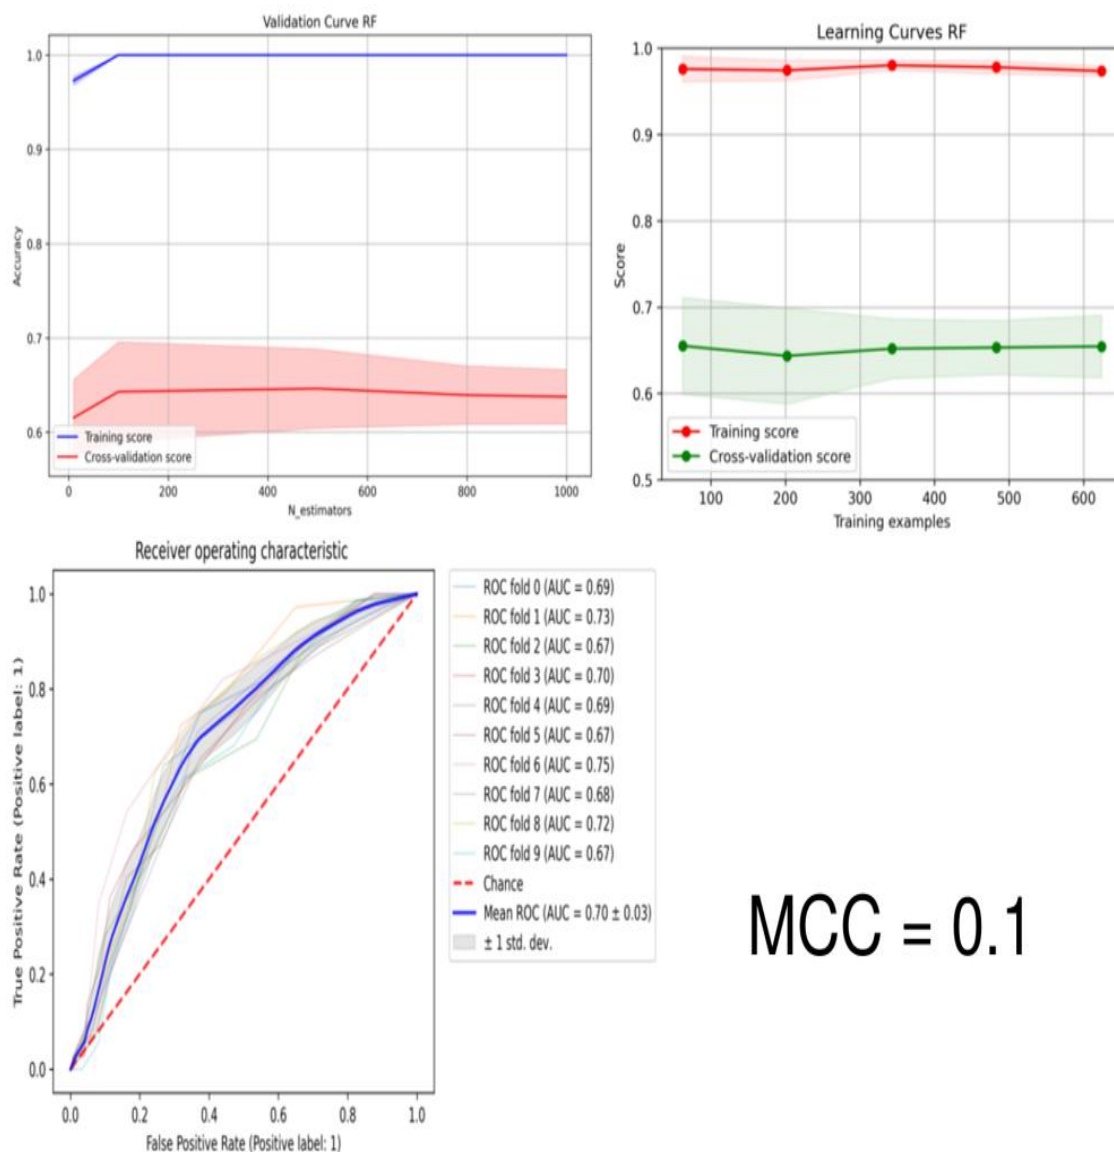

MCC = 0.1

**Figure S6.** Performance assessment of random forest classifier trained with physicochemical descriptors. In order of appearance figure shows model's validation curve, learning curve, k-fold cross validation ROC curve and Matthews correlation coefficient.

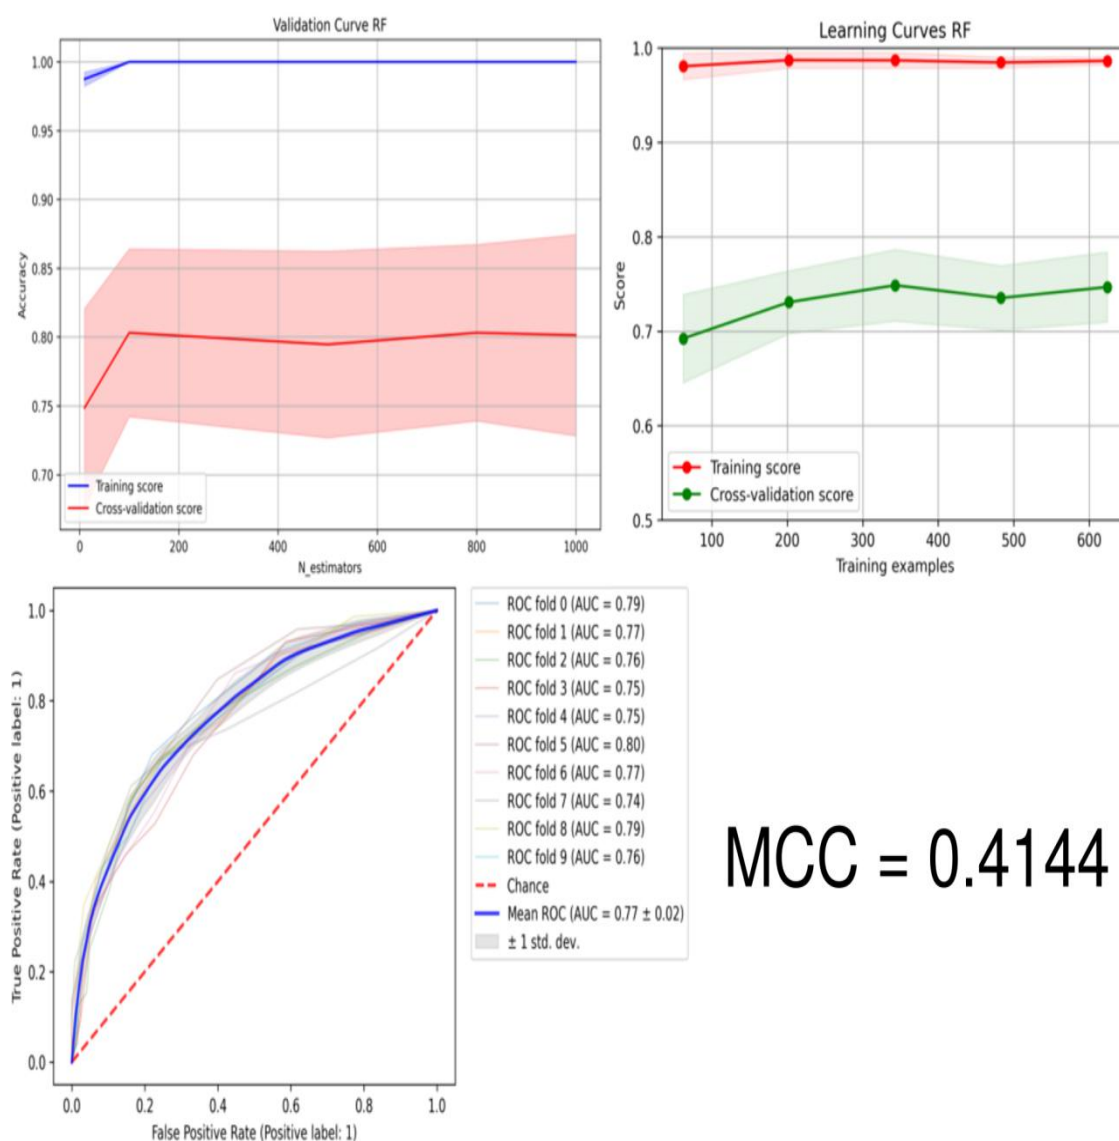

**MCC = 0.4144**

**Figure S7.** Performance assessment of random forest classifier trained with physicochemical descriptors. In order of appearance figure shows model's validation curve, learning curve, k-fold cross validation ROC curve and Matthews correlation coefficient.

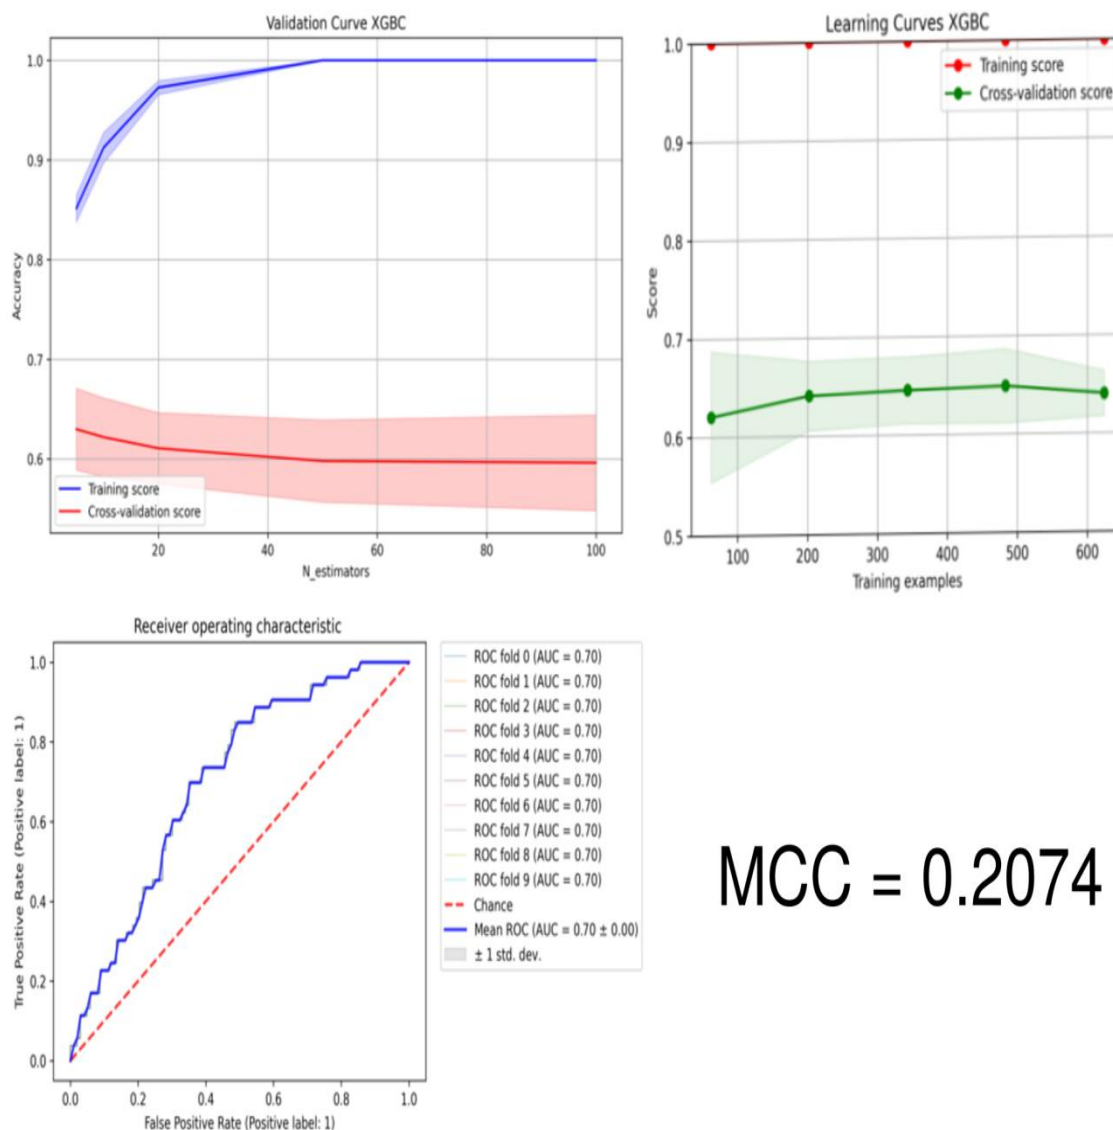

**Figure S8.** Performance assessment of extreme gradient boost classifier trained with physicochemical descriptors. In order of appearance figure shows model's validation curve, learning curve, k-fold cross validation ROC curve and Matthews correlation coefficient.

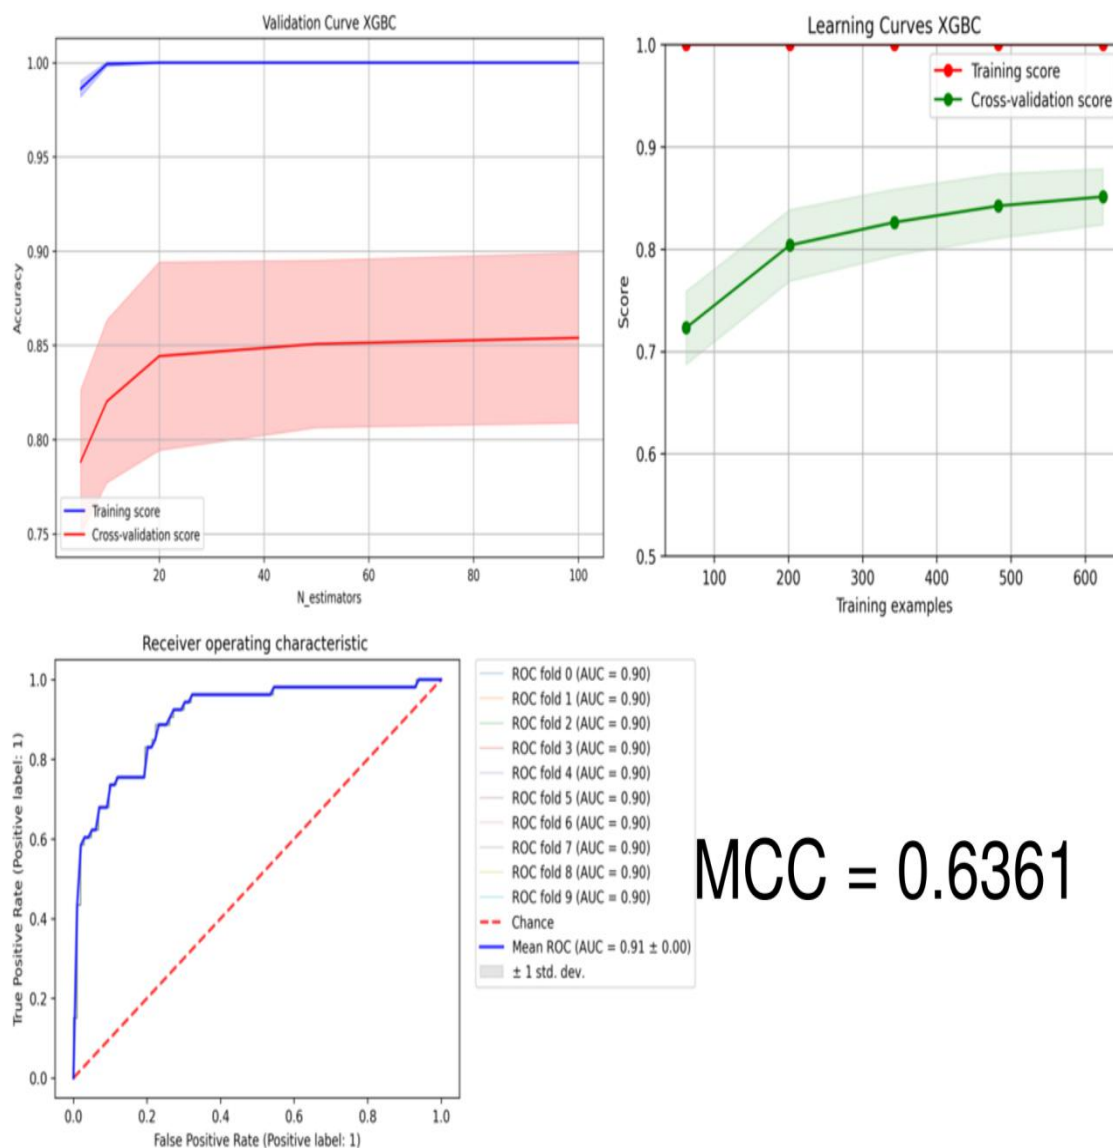

**Figure S9.** Performance assessment of extreme gradient boost classifier trained with physicochemical and structural descriptors. In order of appearance figure shows model's validation curve, learning curve, k-fold cross validation ROC curve and Matthews correlation coefficient.

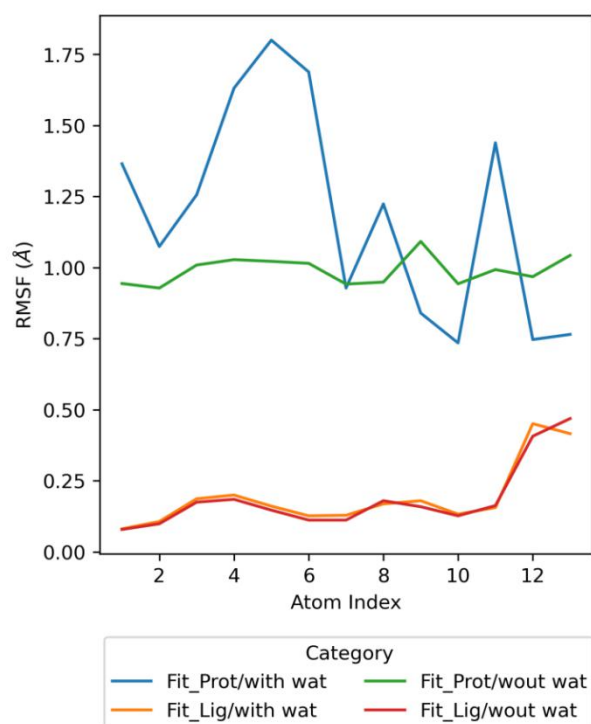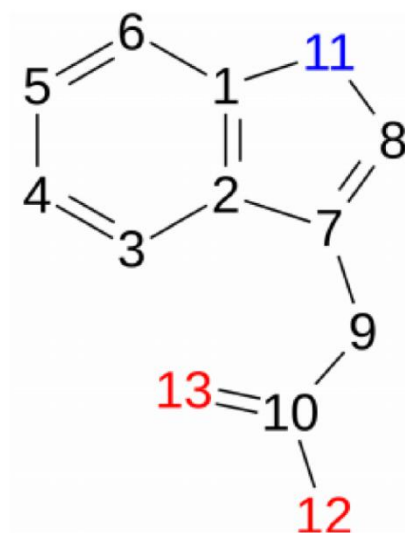

**Figure S10.** Comparison of IAA root mean square fluctuations (RMSF) from different solvation conditions (left); with preserved crystal waters around ligand (blue/orange) and without (green/red). RMSF values are presented with respect to TIR1 and ligand.

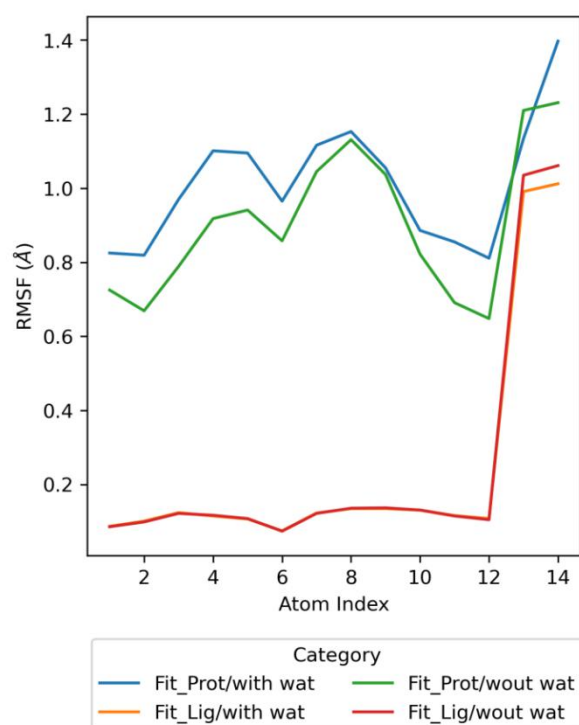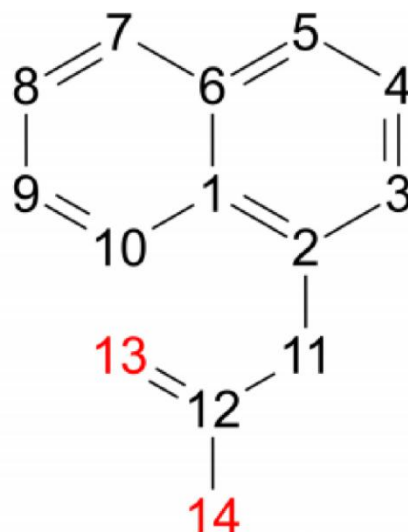

**Figure S11.** Comparison of NAA root mean square fluctuations (RMSF) from different solvation conditions (left); with preserved crystal waters around ligand (blue/orange) and without (green/red). RMSF values are presented with respect to TIR1 and ligand.

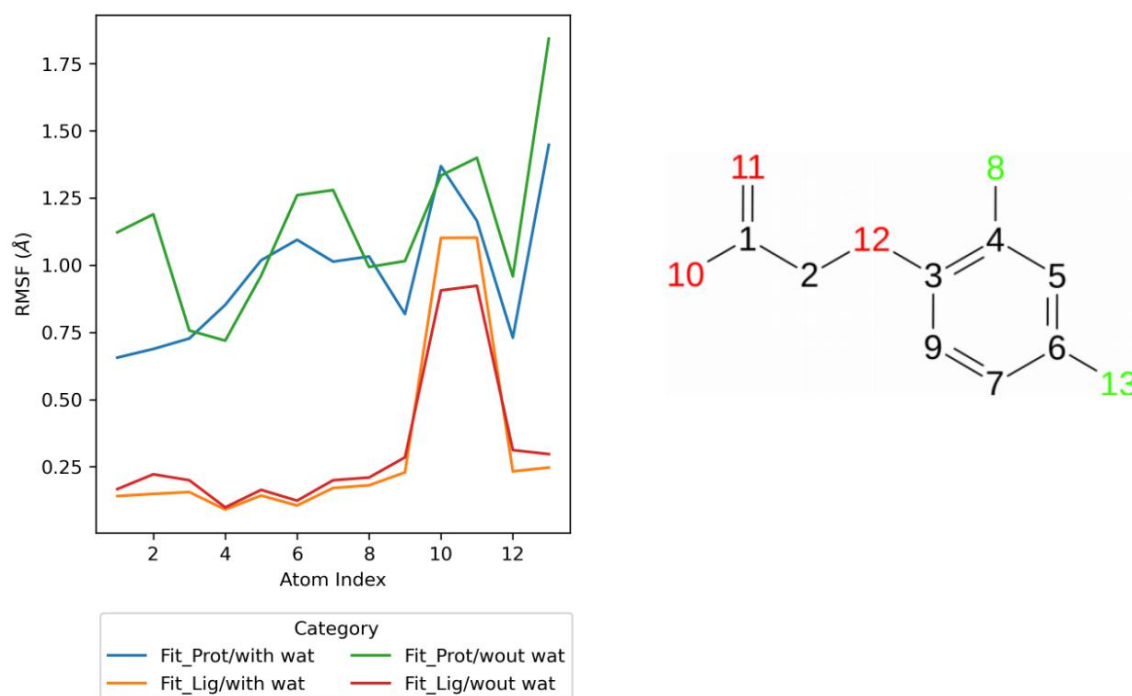

**Figure S12.** Comparison of 2,4-D root mean square fluctuations (RMSF) from different solvation conditions (left); with preserved crystal waters around ligand (blue/orange) and without (green/red). RMSF values are presented with respect to TIR1 and ligand.

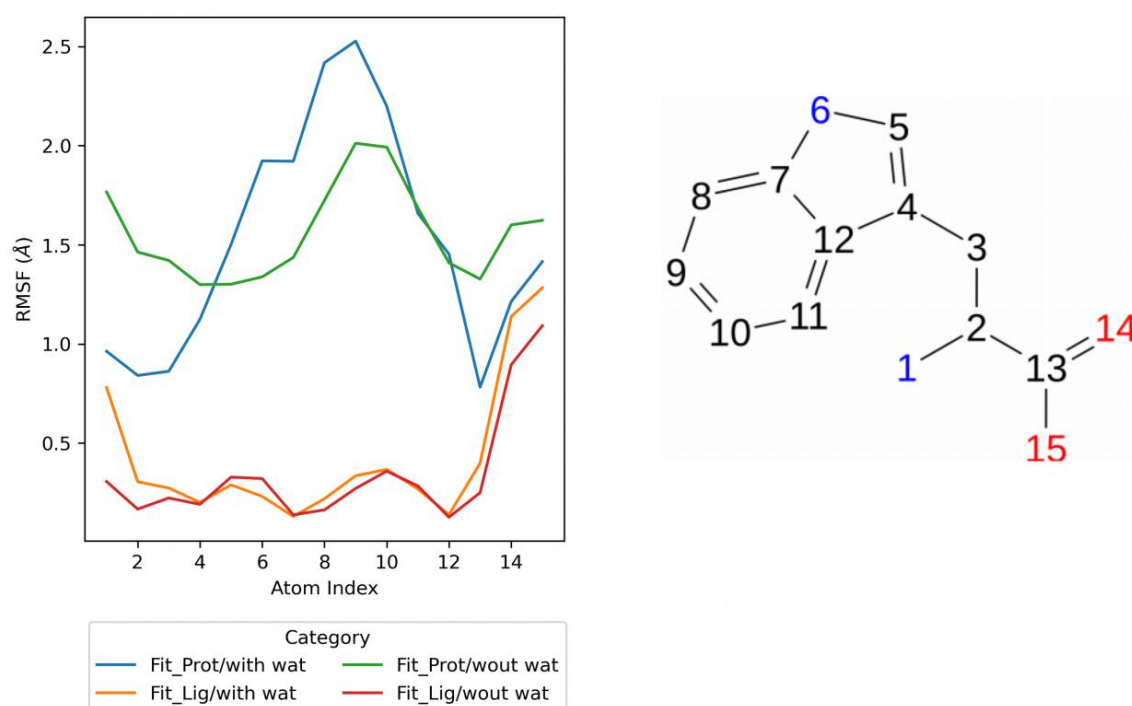

**Figure S13.** Comparison of TRP root mean square fluctuations (RMSF) from different solvation conditions (left); with preserved crystal waters around ligand (blue/orange) and without (green/red). RMSF values are presented with respect to TIR1 and ligand.

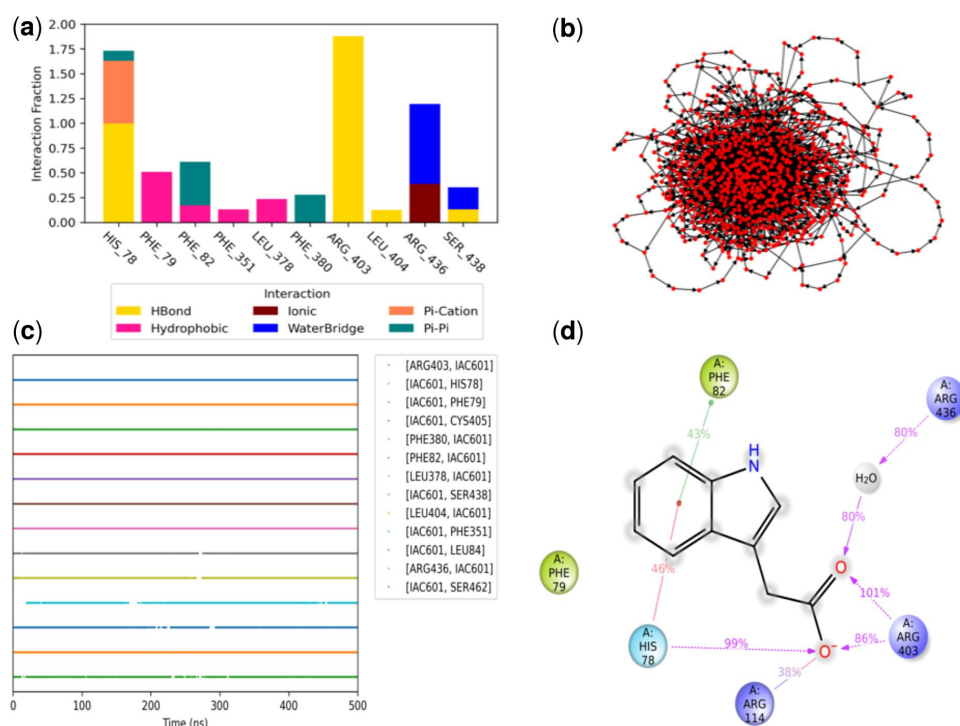

**Figure S14.** Consensus analysis of MD simulation of indol acetic acid (IAA); a) Protein-ligand interaction fraction; b) Concurrence of contacts; c) Transition network for protein-ligand interactions; d) Ligand-protein interaction.

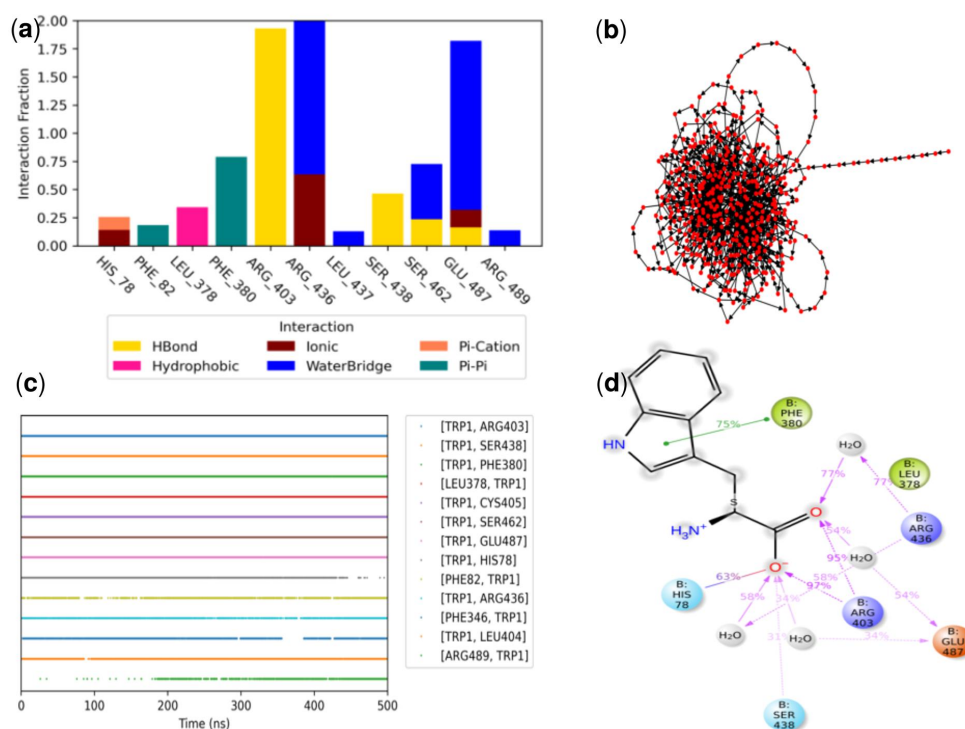

**Figure S15.** Consensus analysis of MD simulation of tryptophan (TRP); a) Protein-ligand interaction fraction; b) Concurrence of contacts; c) Transition network for protein-ligand interactions; d) Ligand-protein interaction.



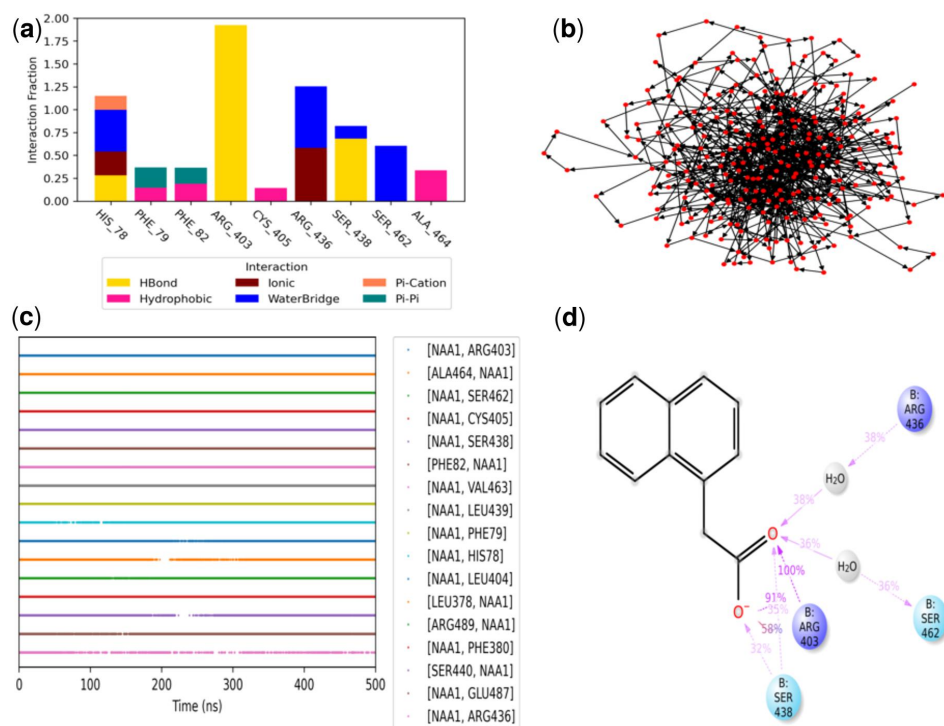

**Figure S16.** Consensus analysis of MD simulation of 1-naphtyl acetic acid (NAA); a) Protein-ligand interaction fraction; b) Concurrence of contacts; c) Transition network for protein-ligand interactions; d) Ligand-protein interaction.

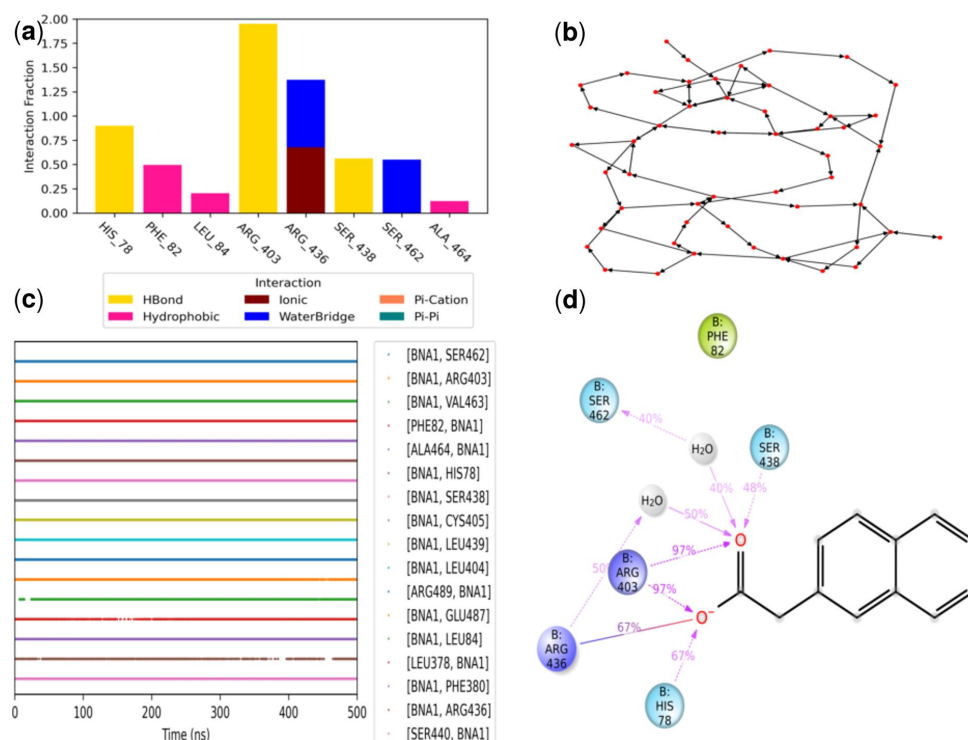

**Figure S17.** Consensus analysis of MD simulation of 2-naphtyl acetic acid (2-NAA); a) Protein-ligand interaction fraction; b) Concurrence of contacts; c) Transition network for protein-ligand interactions; d) Ligand-protein interaction.

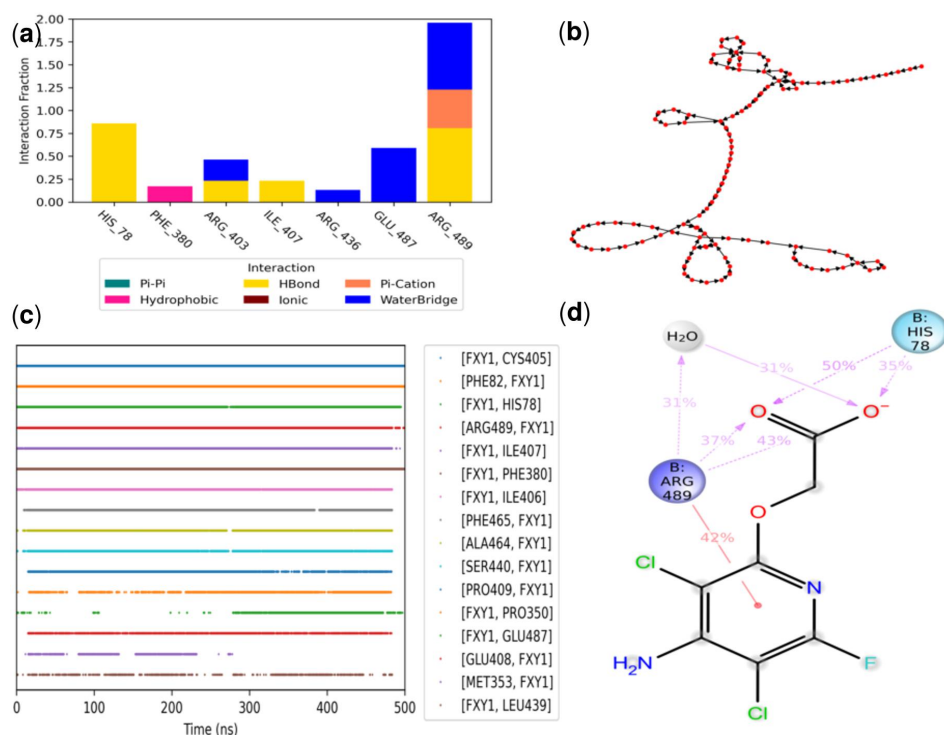

**Figure S18.** Consensus analysis of MD simulation of fluroxypyr (FXY); a) Protein-ligand interaction fraction; b) Concurrence of contacts; c) Transition network for protein-ligand interactions; d) Ligand-protein interaction.

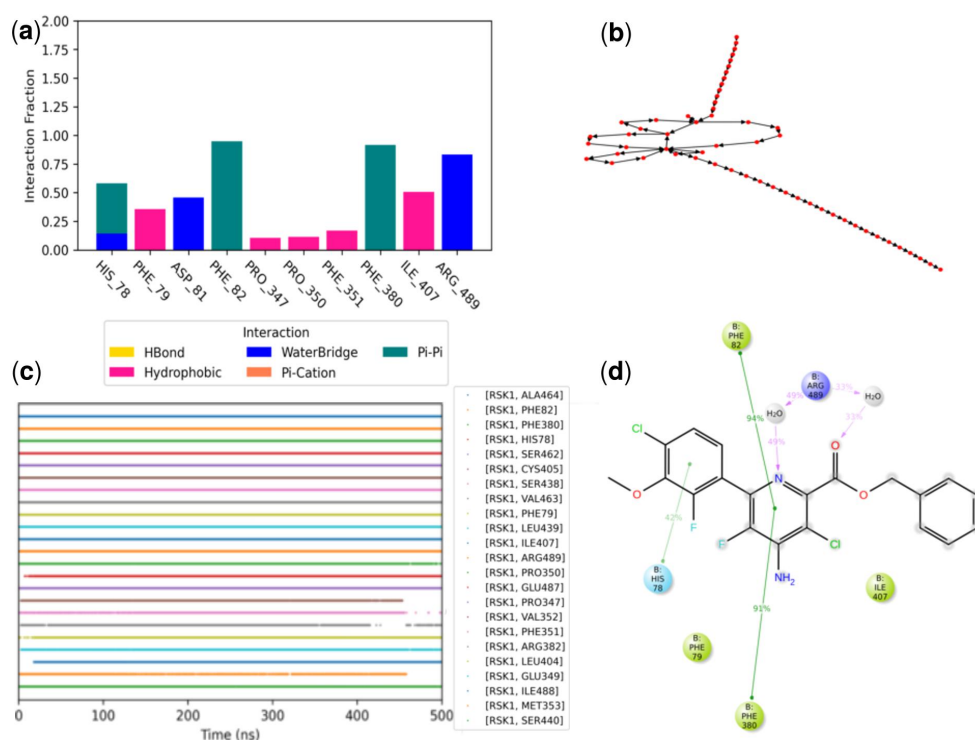

**Figure S19.** Consensus analysis of MD simulation of rinskor (RSK); a) Protein-ligand interaction fraction; b) Concurrence of contacts; c) Transition network for protein-ligand interactions; d) Ligand-protein interaction.

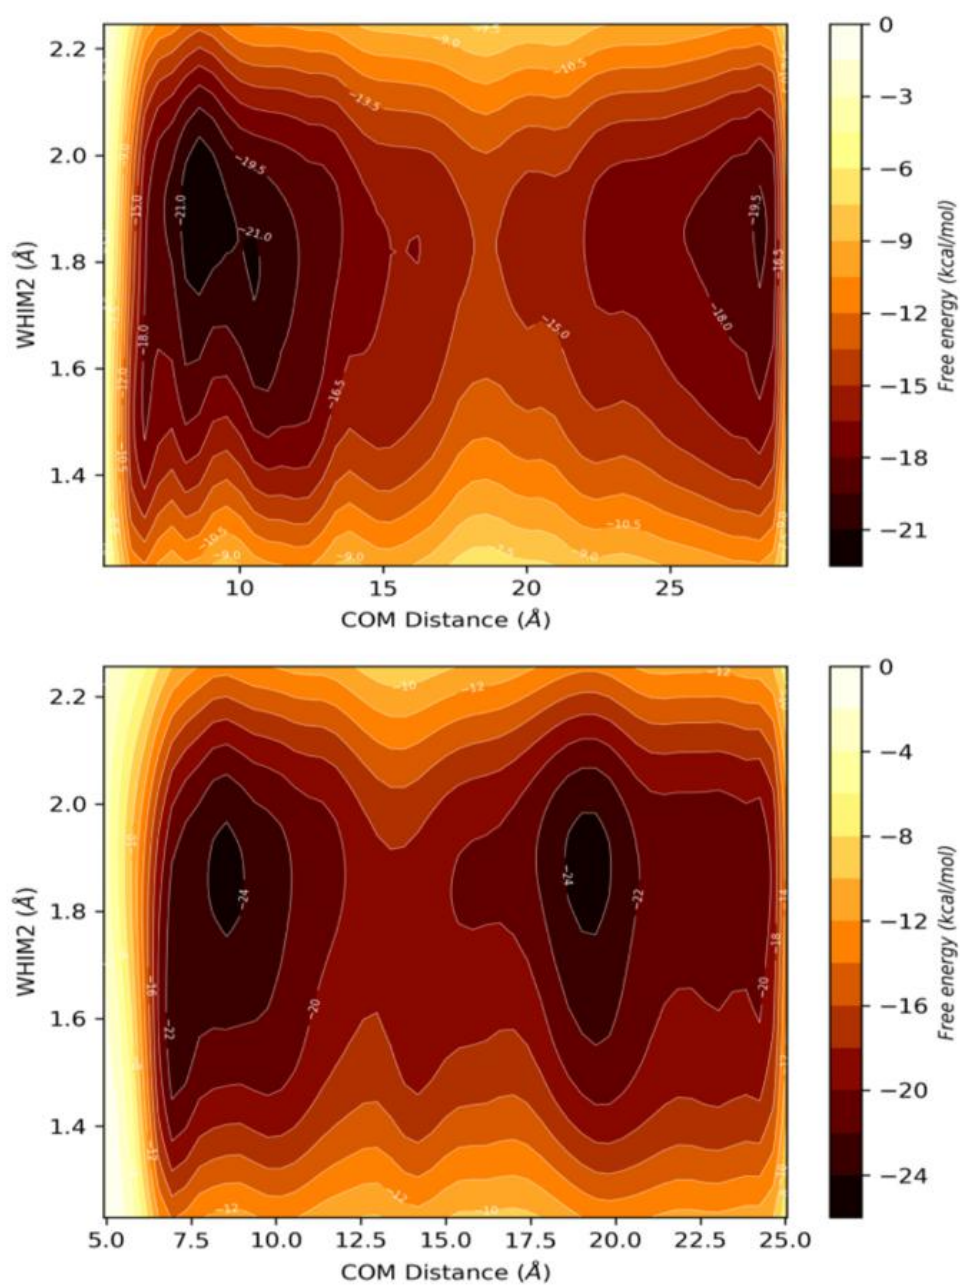

**Figure S20.** Free energy surfaces computed from well-tempered metadynamics for the NAA-TIR1 complexes. With ligand positioned within the binding site (top) and positioned within the engagement niche (bottom).



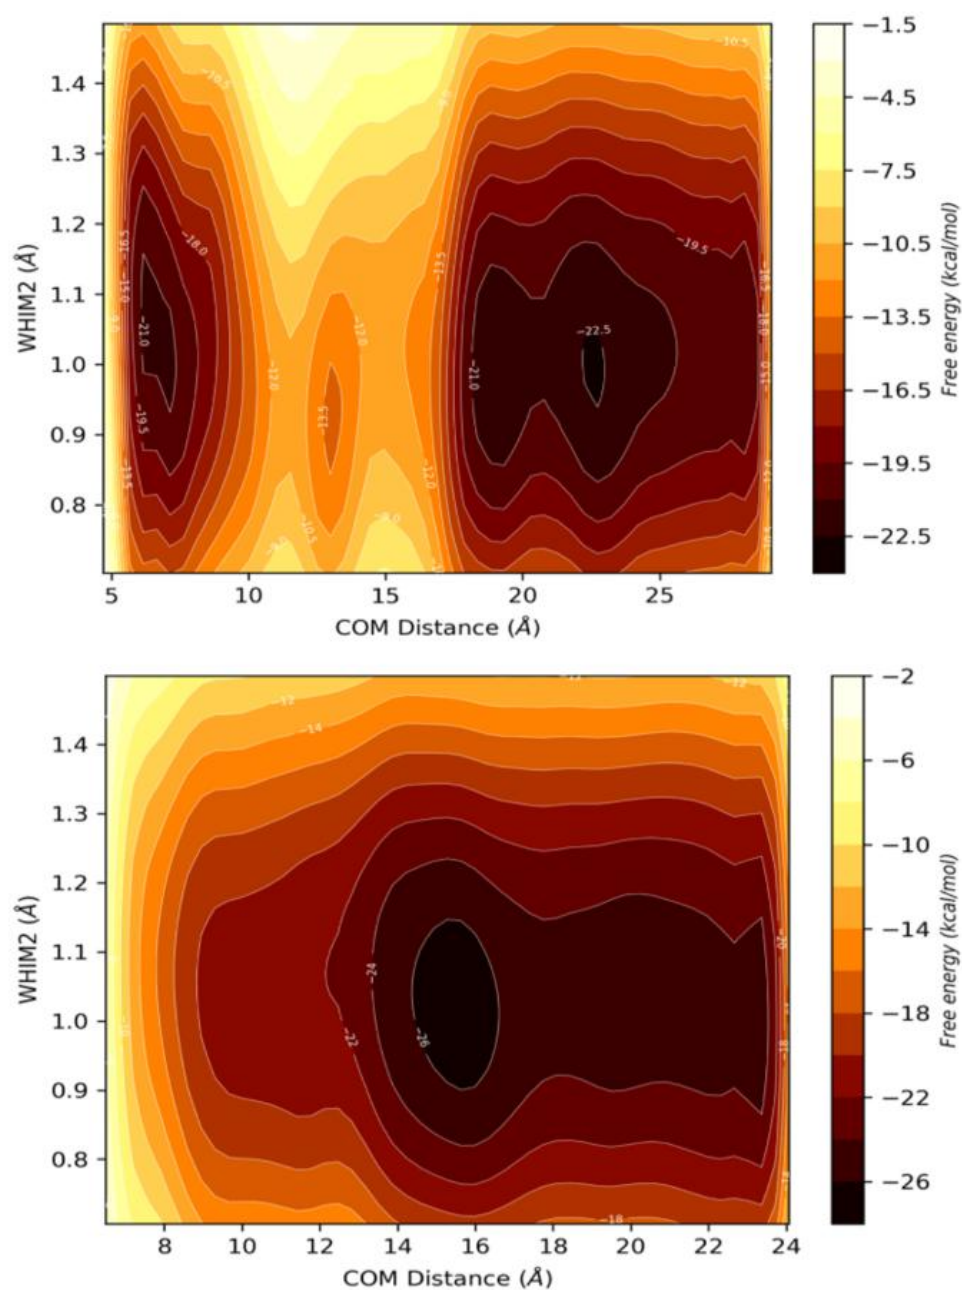

**Figure 22.** Free energy surfaces computed from well-tempered metadynamics for the 2-NAA-TIR1 complexes. With ligand positioned within the binding site (top) and positioned within the engagement niche (bottom).

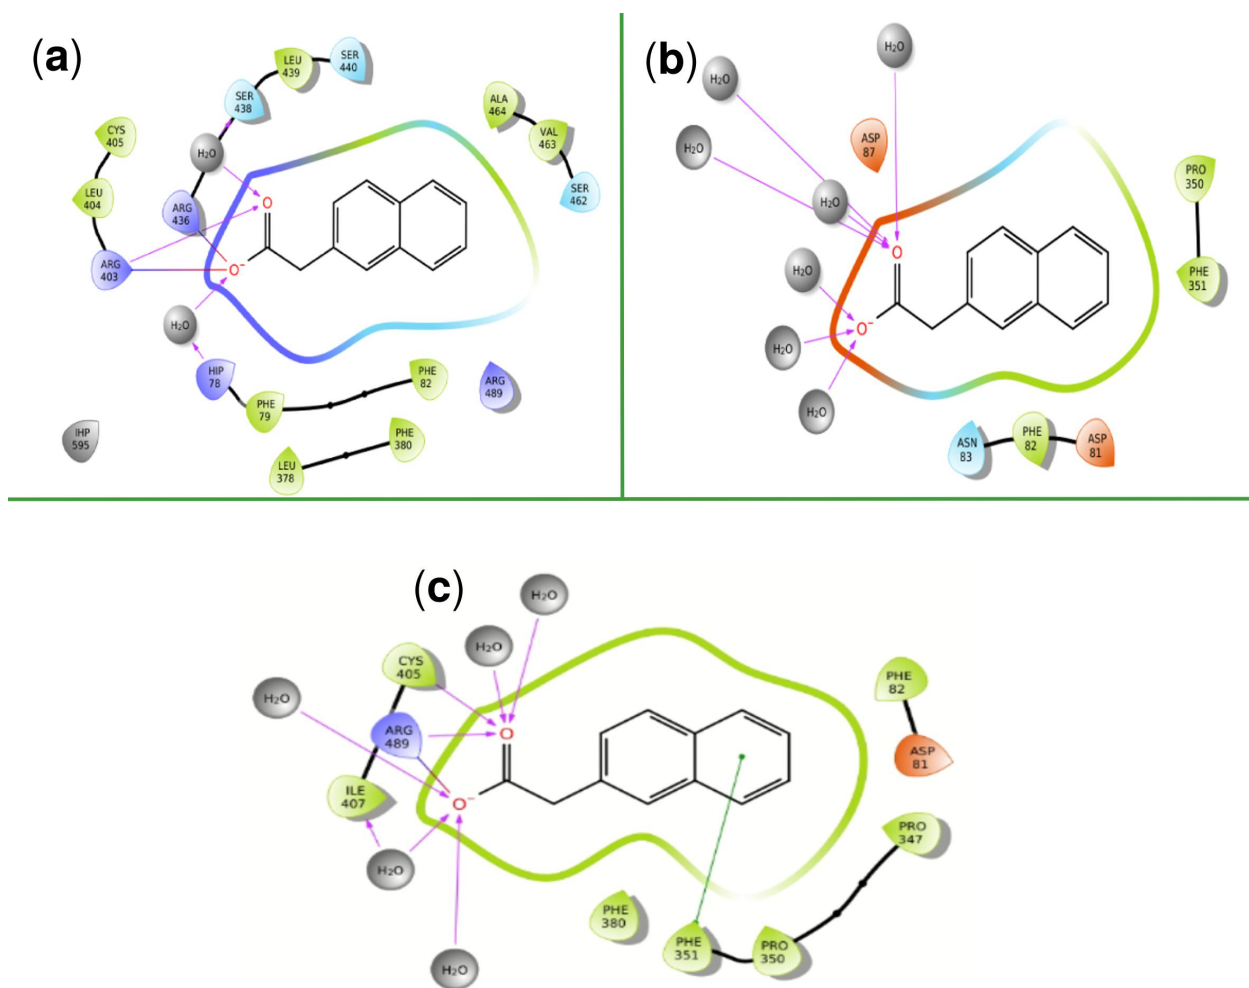

**Figure 23.** Representative 2-NAA conformations found at basins from metadynamics runs. With ligand positioned within the binding site (a & b) and positioned within the engagement niche (c).



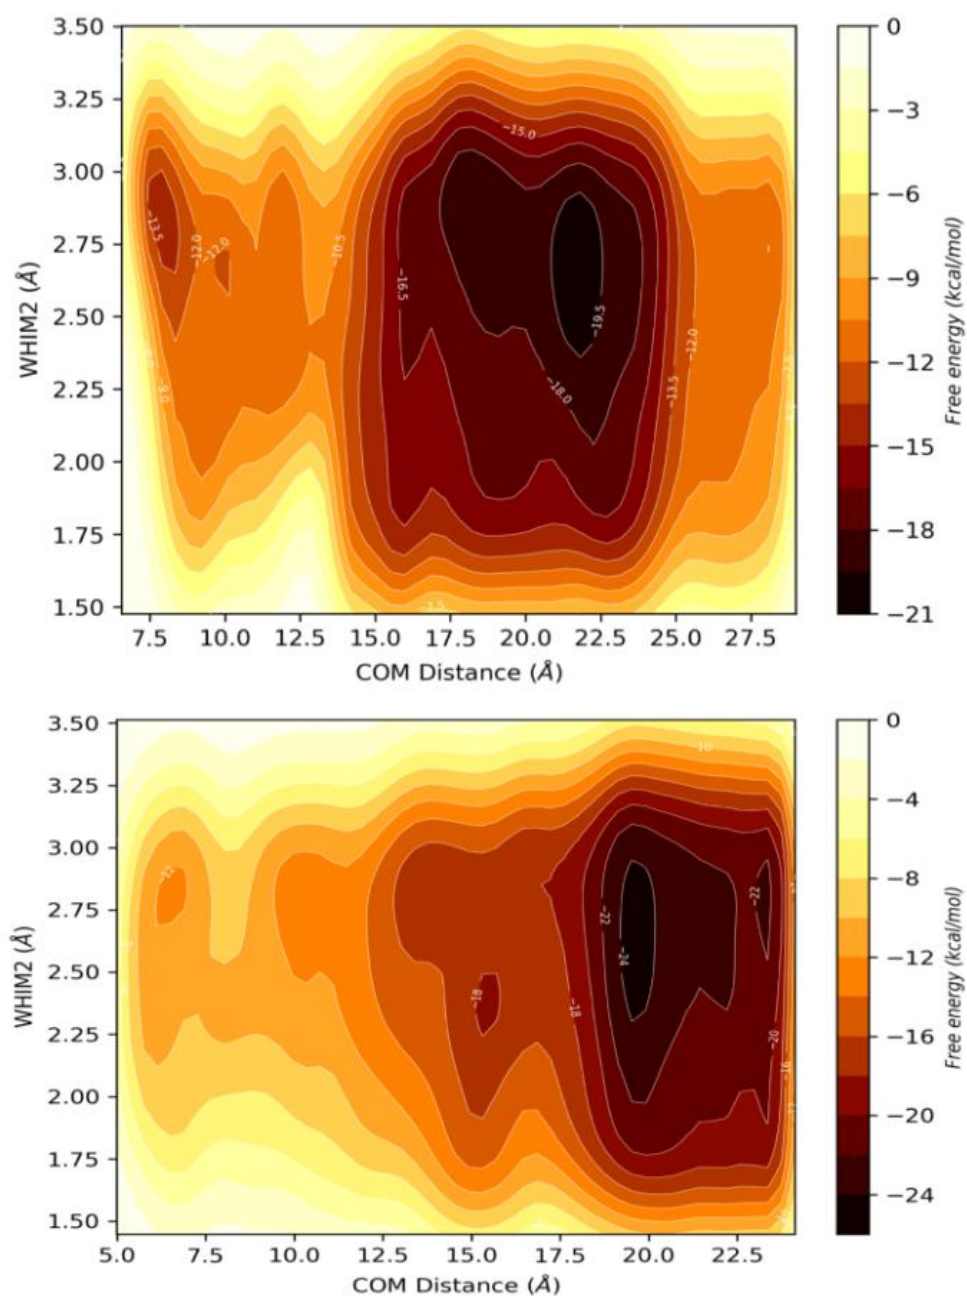

**Figure 24.** Free energy surfaces computed from well-tempered metadynamics for the FXY-TIR1 complexes. With ligand positioned within the binding site (top) and positioned within the engagement niche (bottom).

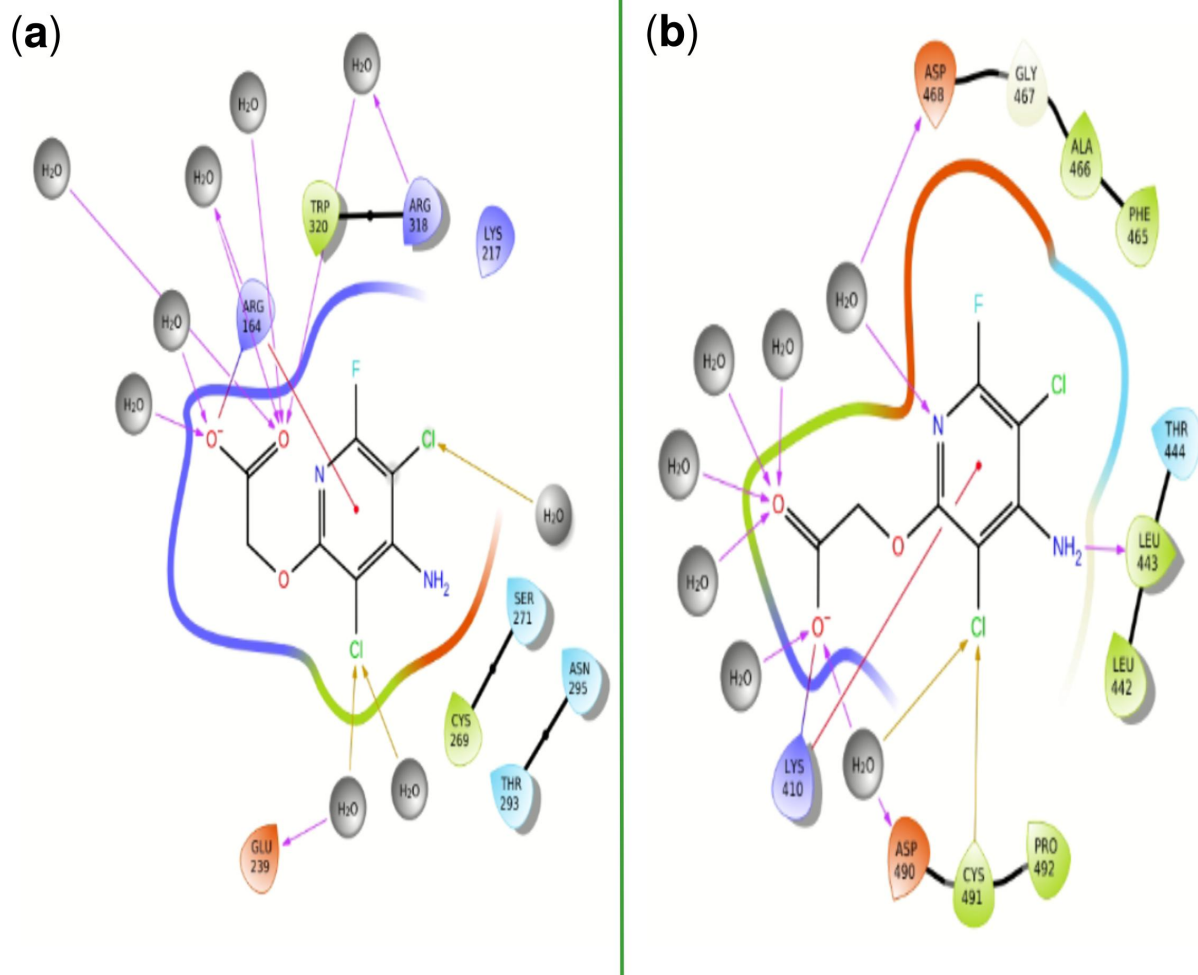

**Figure 25.** Representative FXY conformations found at basins from metadynamics runs. With ligand positioned within the binding site (a) and positioned within the engagement niche (b).



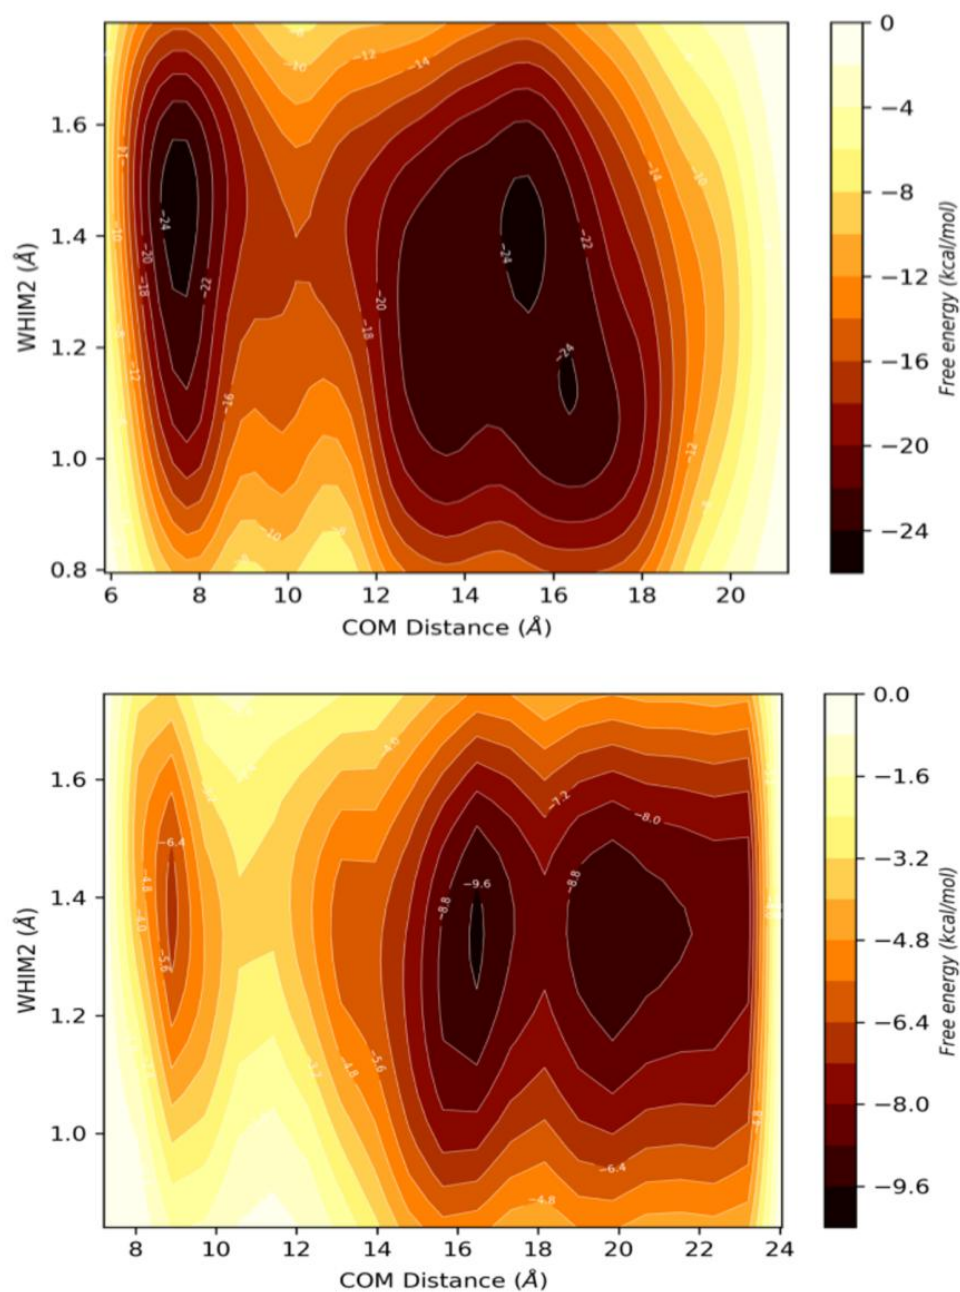

**Figure 26.** Free energy surfaces computed from well-tempered metadynamics for the IAA-TIR1 complexes. With ligand positioned within the binding site (top) and positioned within the engagement niche (bottom).

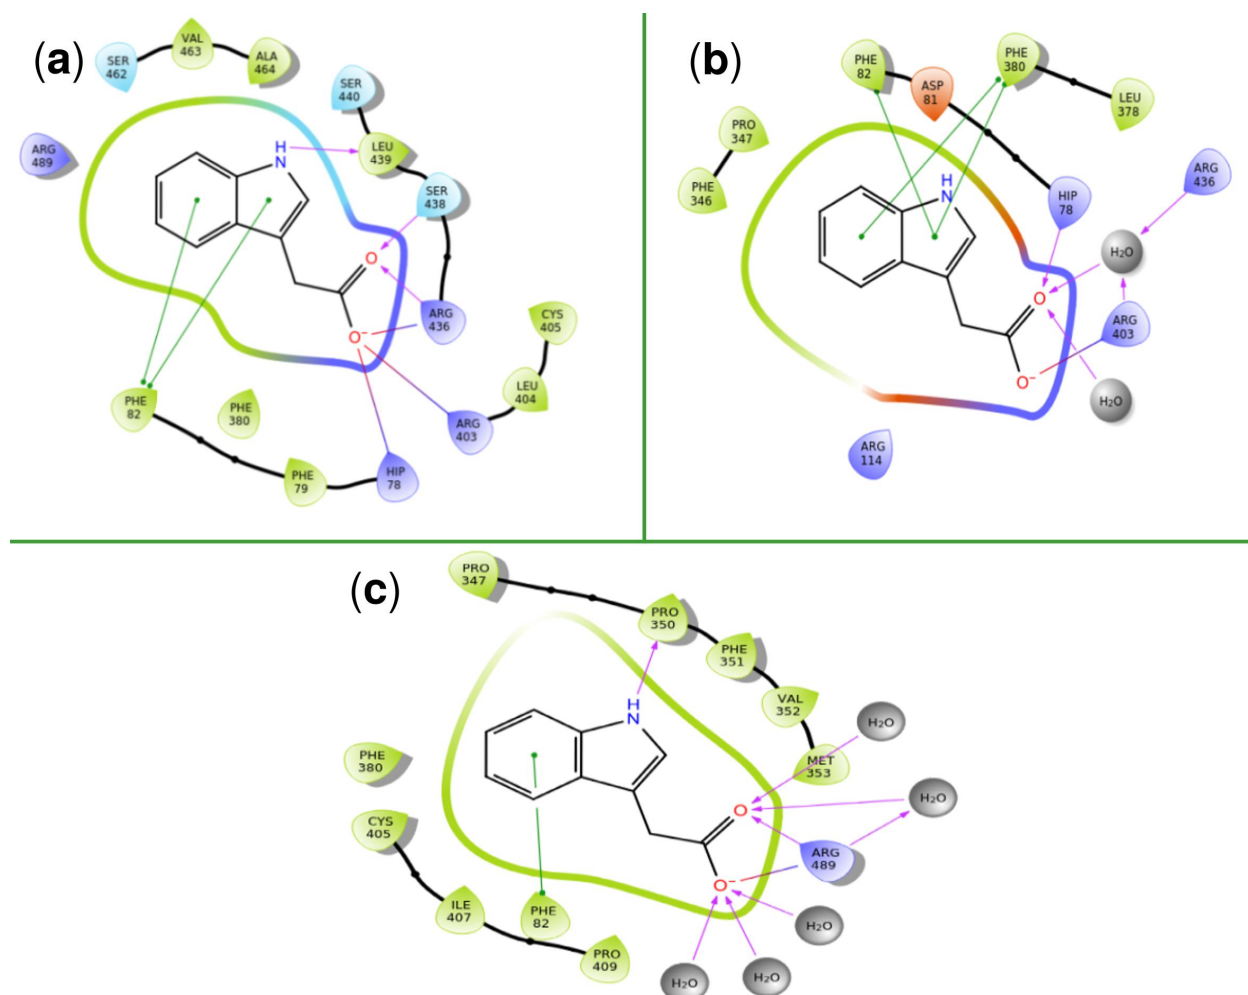

**Figure 27.** Representative IAA conformations found at basins from metadynamics runs. With ligand positioned within the binding site (a & b) and positioned within the engagement niche (c).

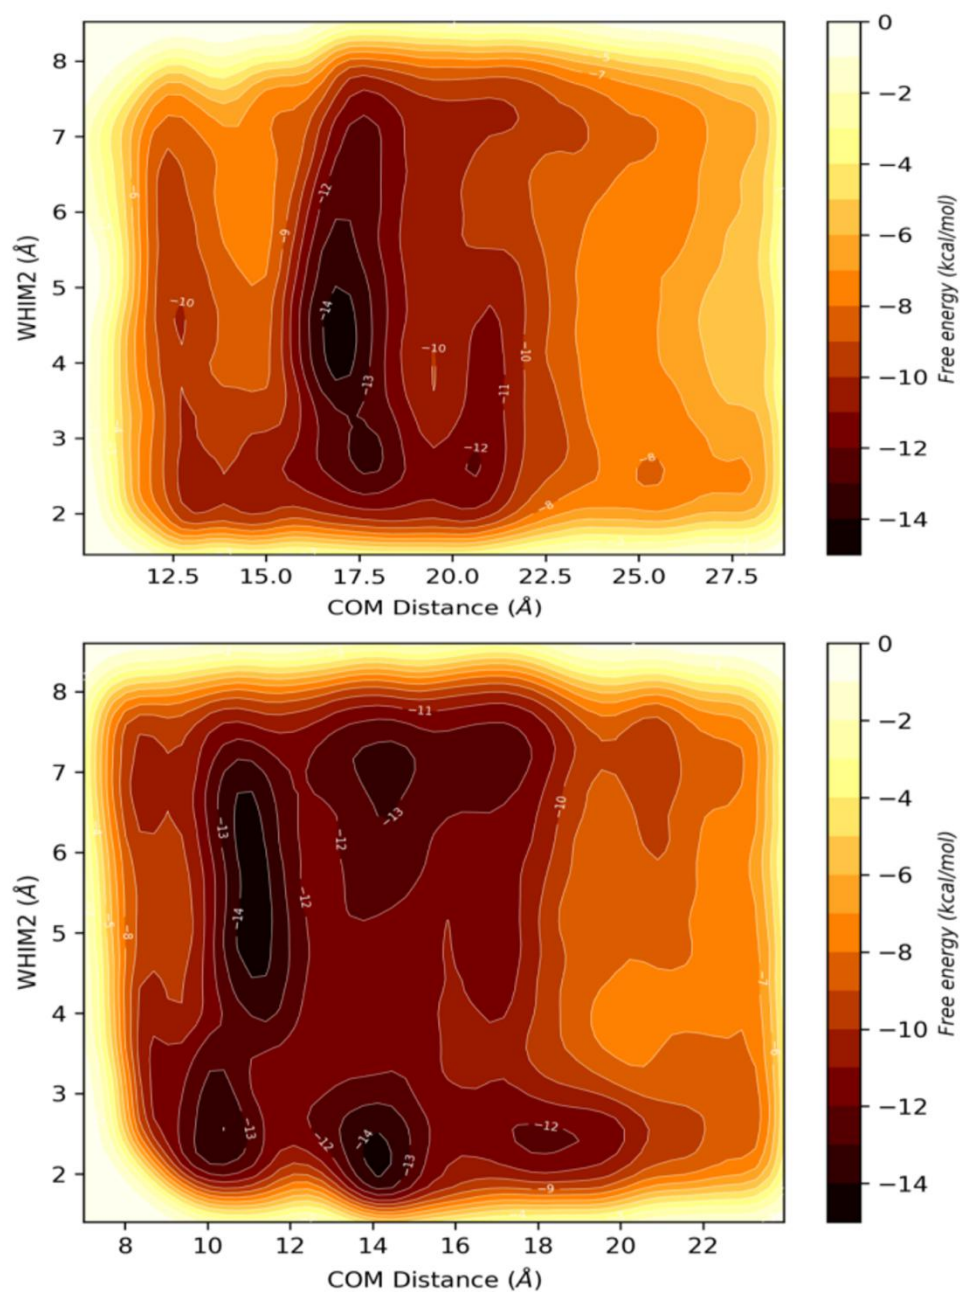

**Figure 28.** Free energy surfaces computed from well-tempered metadynamics for the RSK-TIR1 complexes. With ligand positioned within the binding site (top) and positioned within the engagement niche (bottom).

(a)

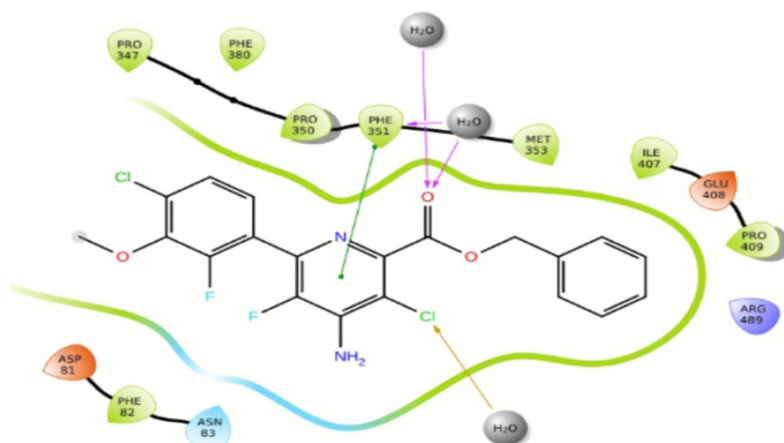

(b)

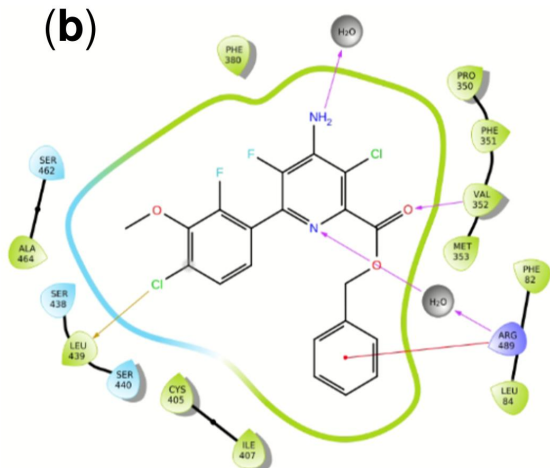

(c)

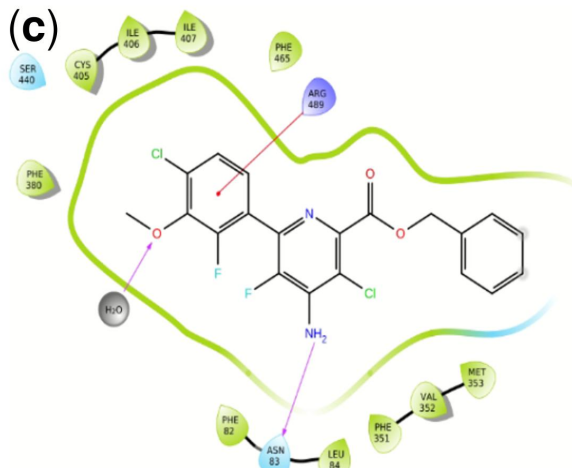

**Figure 29.** Representative RSK conformations found at basins from metadynamics runs. With ligand positioned within the binding site (a) and positioned within the engagement niche (b).

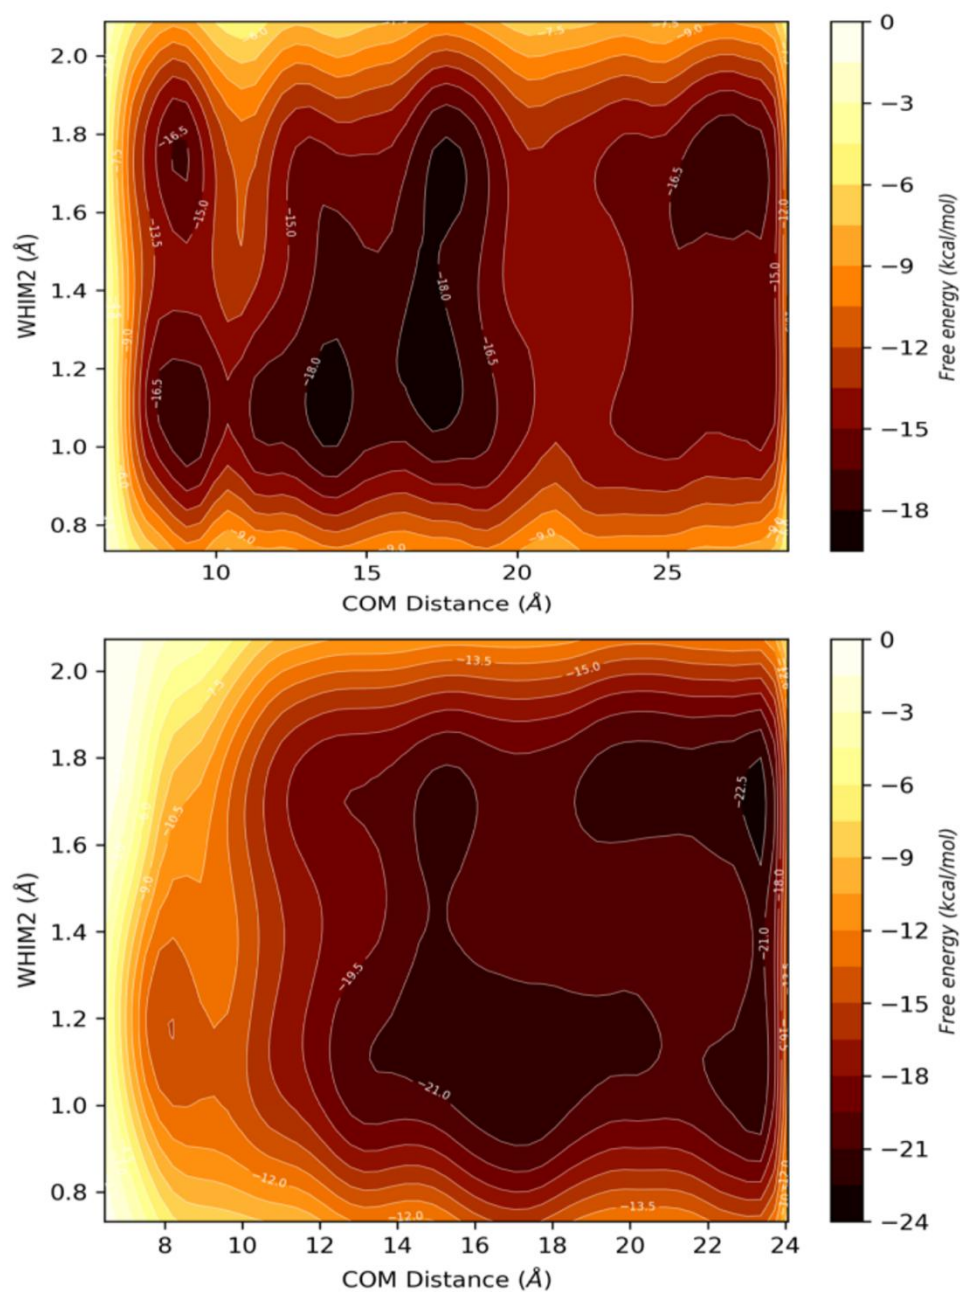

**Figure 30.** Free energy surfaces computed from well-tempered metadynamics for the TRP-TIR1 complexes. With ligand positioned within the binding site (top) and positioned within the engagement niche (bottom).

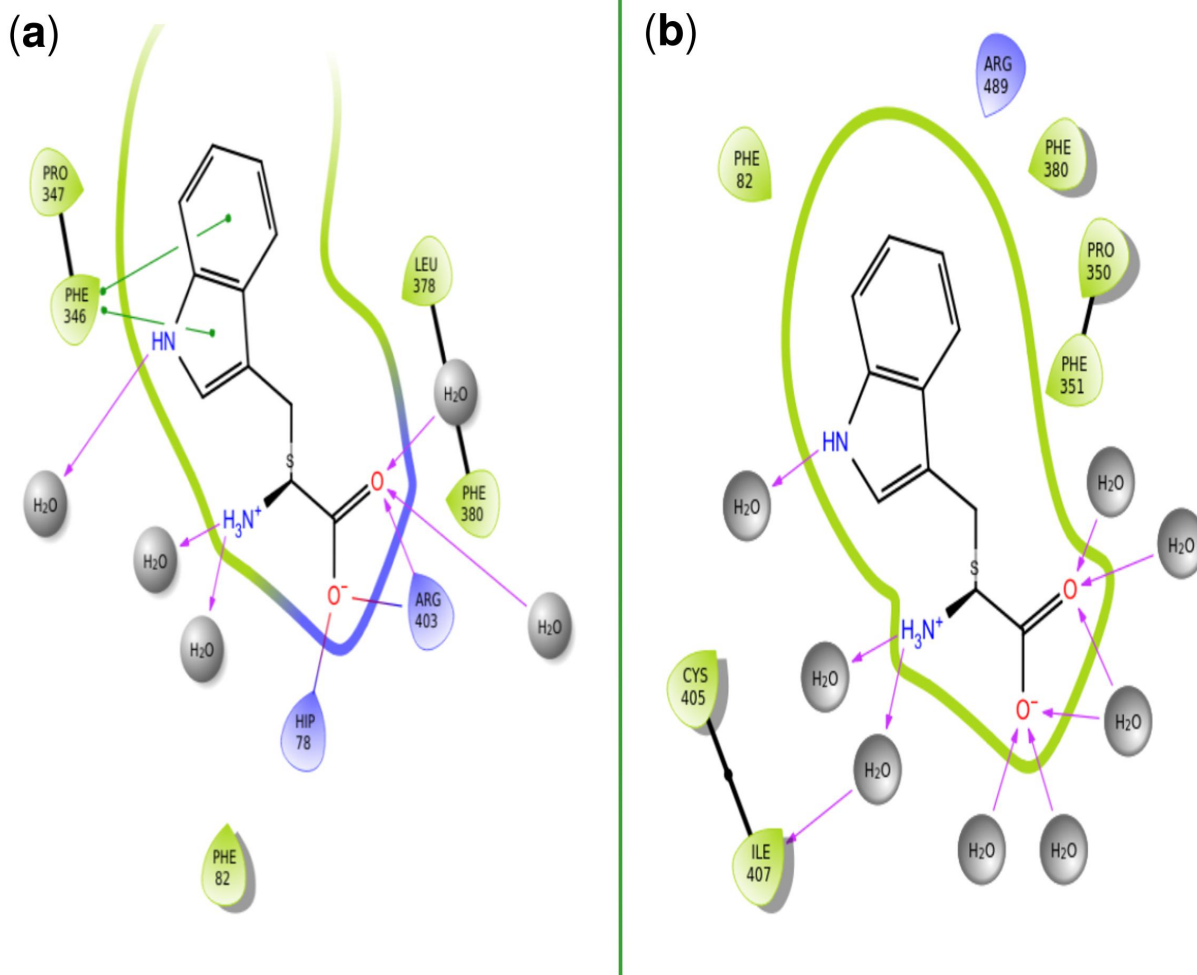

**Figure 31.** Representative TRP conformations found at basins from metadynamics runs. With ligand positioned within the binding site (a) and positioned within the engagement niche (b).
